# Supplementary material for: Bottom-Up Design Approach for OBOC Peptide Libraries
Source: MDPI journal article supplement (doi:10.3390/molecules25153316), 2020-07-22
Supplement: s1 [file s1]

Zoom mass spectrum  
m/z 514-536

AV: 1 NL: 5.43E4

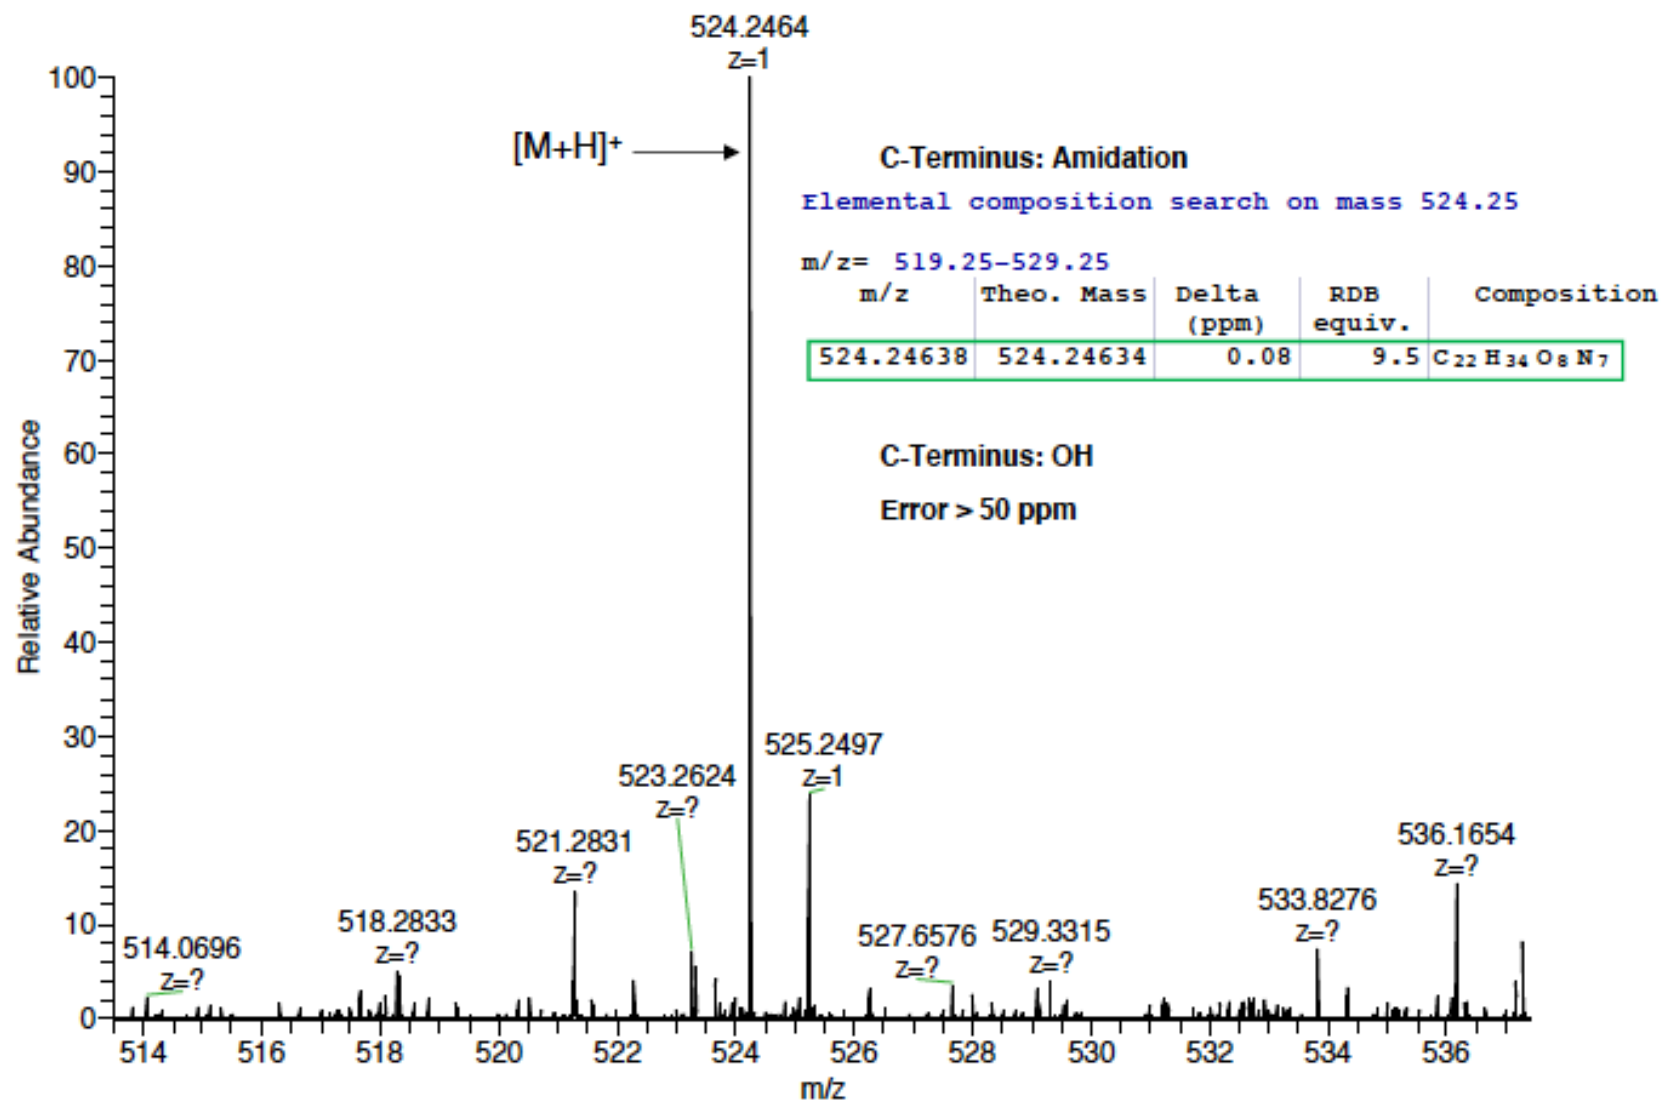

Zoom mass spectrum  
m/z 534-548

AV: 1 NL: 4.68E4

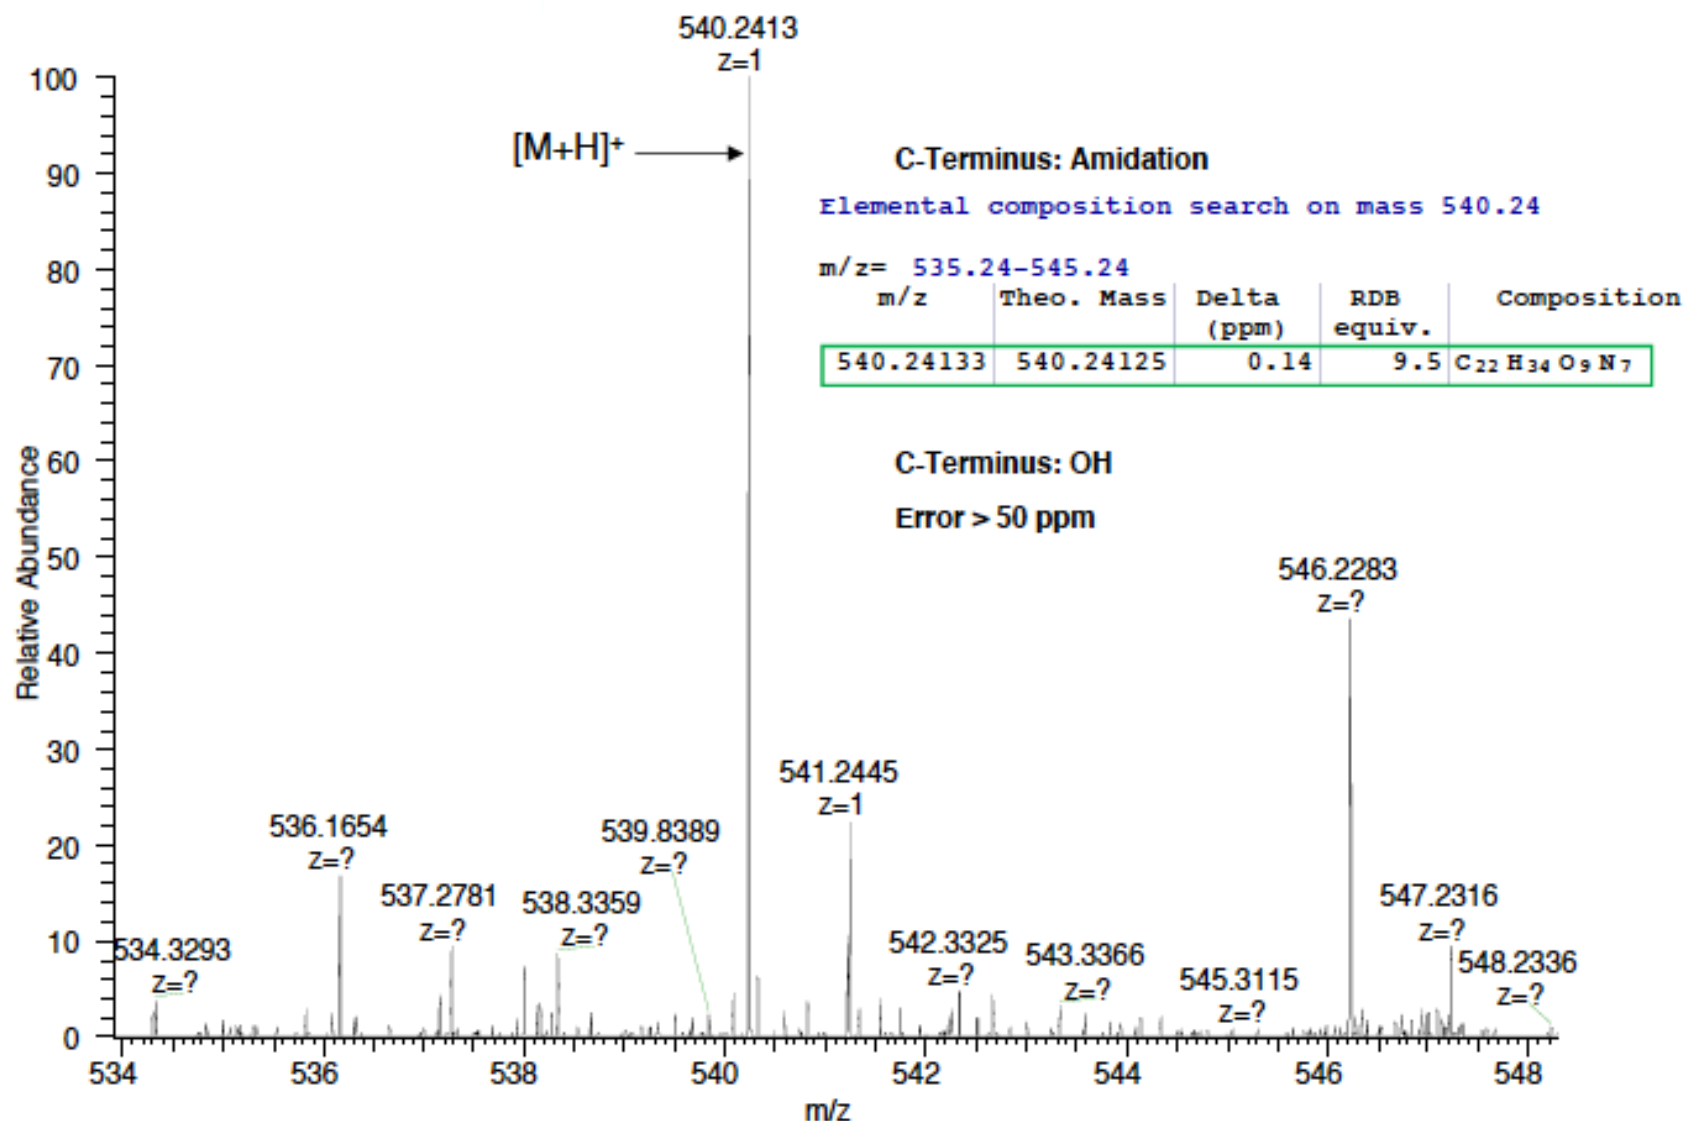

GeGaay

# Zoom mass spectrum

m/z 556-580

AV: 1 NL: 6.19E4

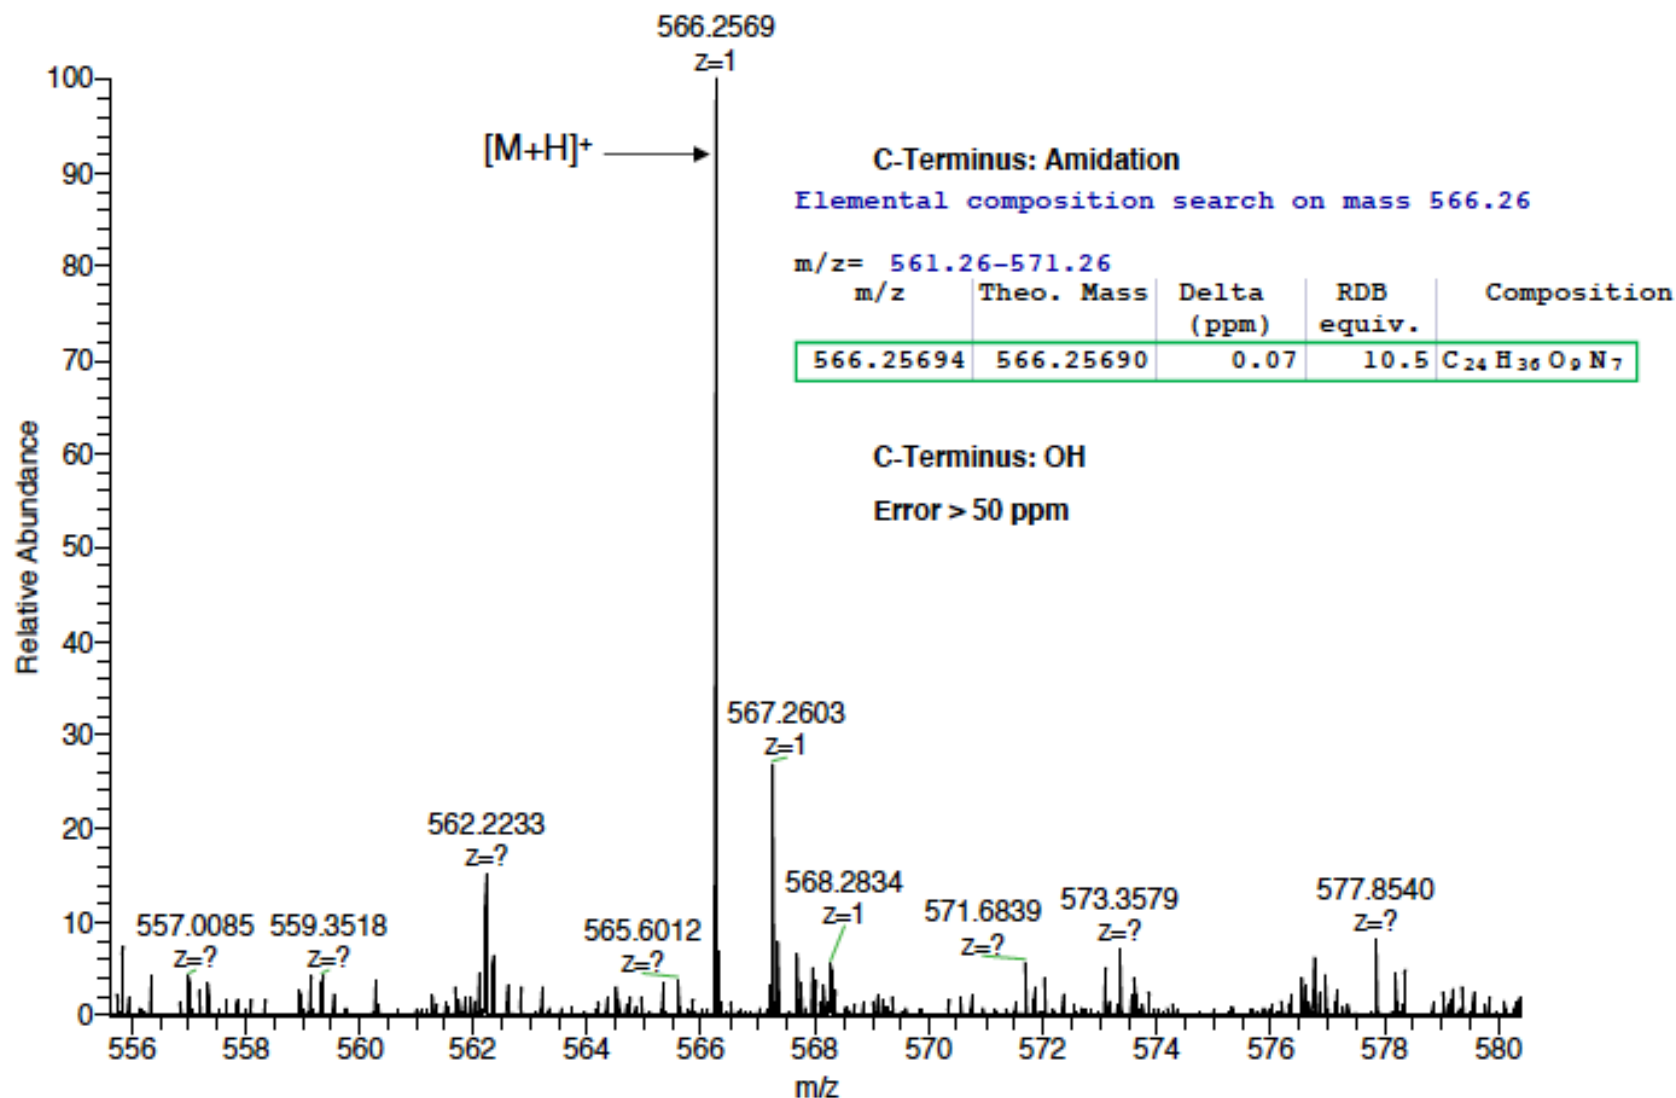

## Zoom mass spectrum

m/z 575-592

AV: 1 NL: 5.15E4

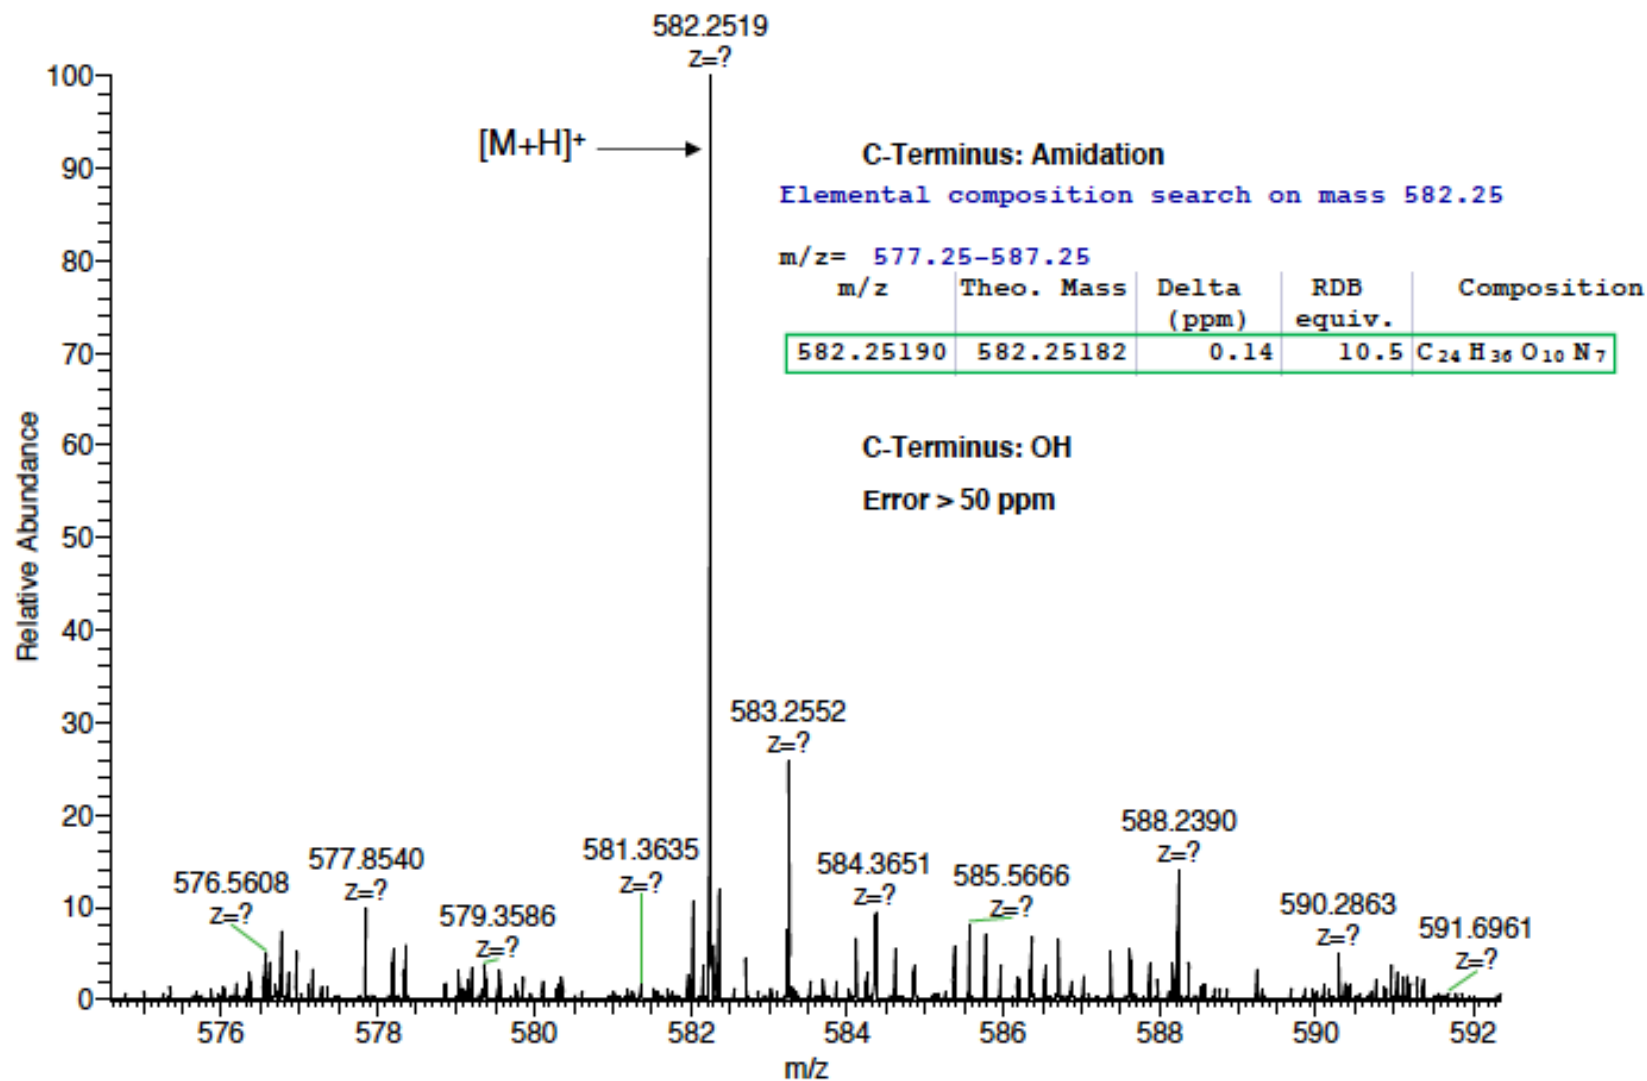

GsGray

# Zoom mass spectrum

m/z 600-621

AV: 1 NL: 6.31E4

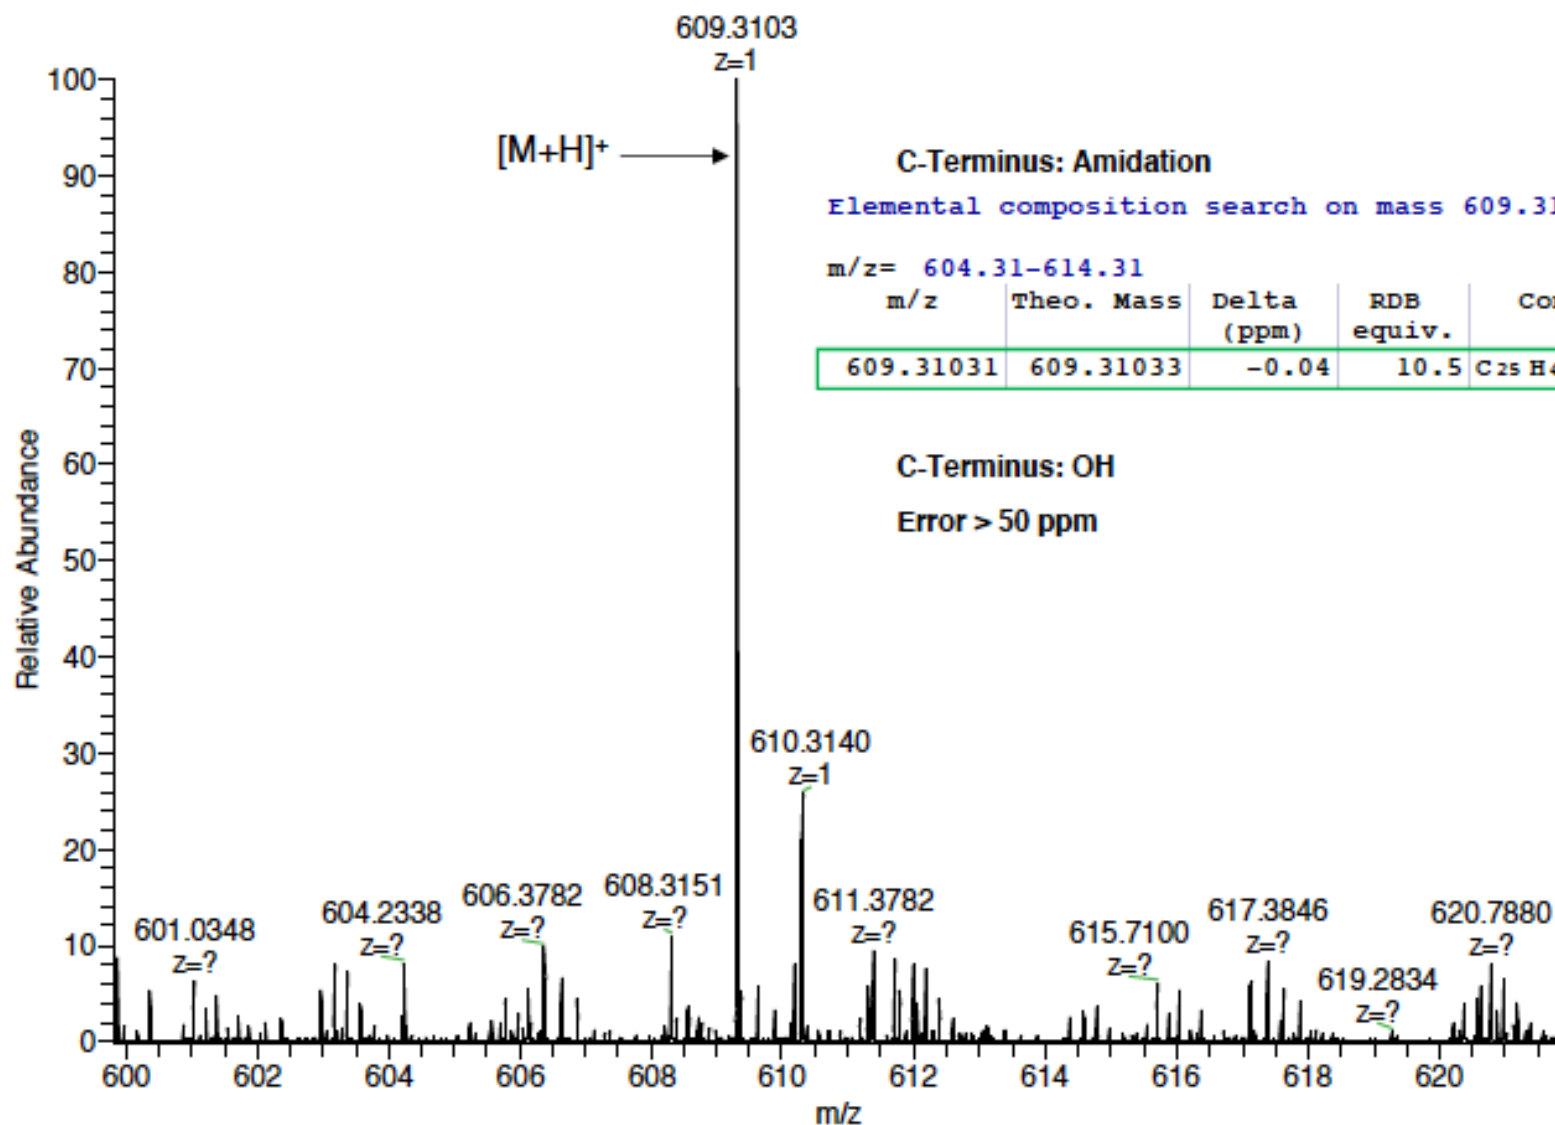

Gsraay

# Zoom mass spectrum

m/z 610-633

AV: 1 NL: 1.10E5

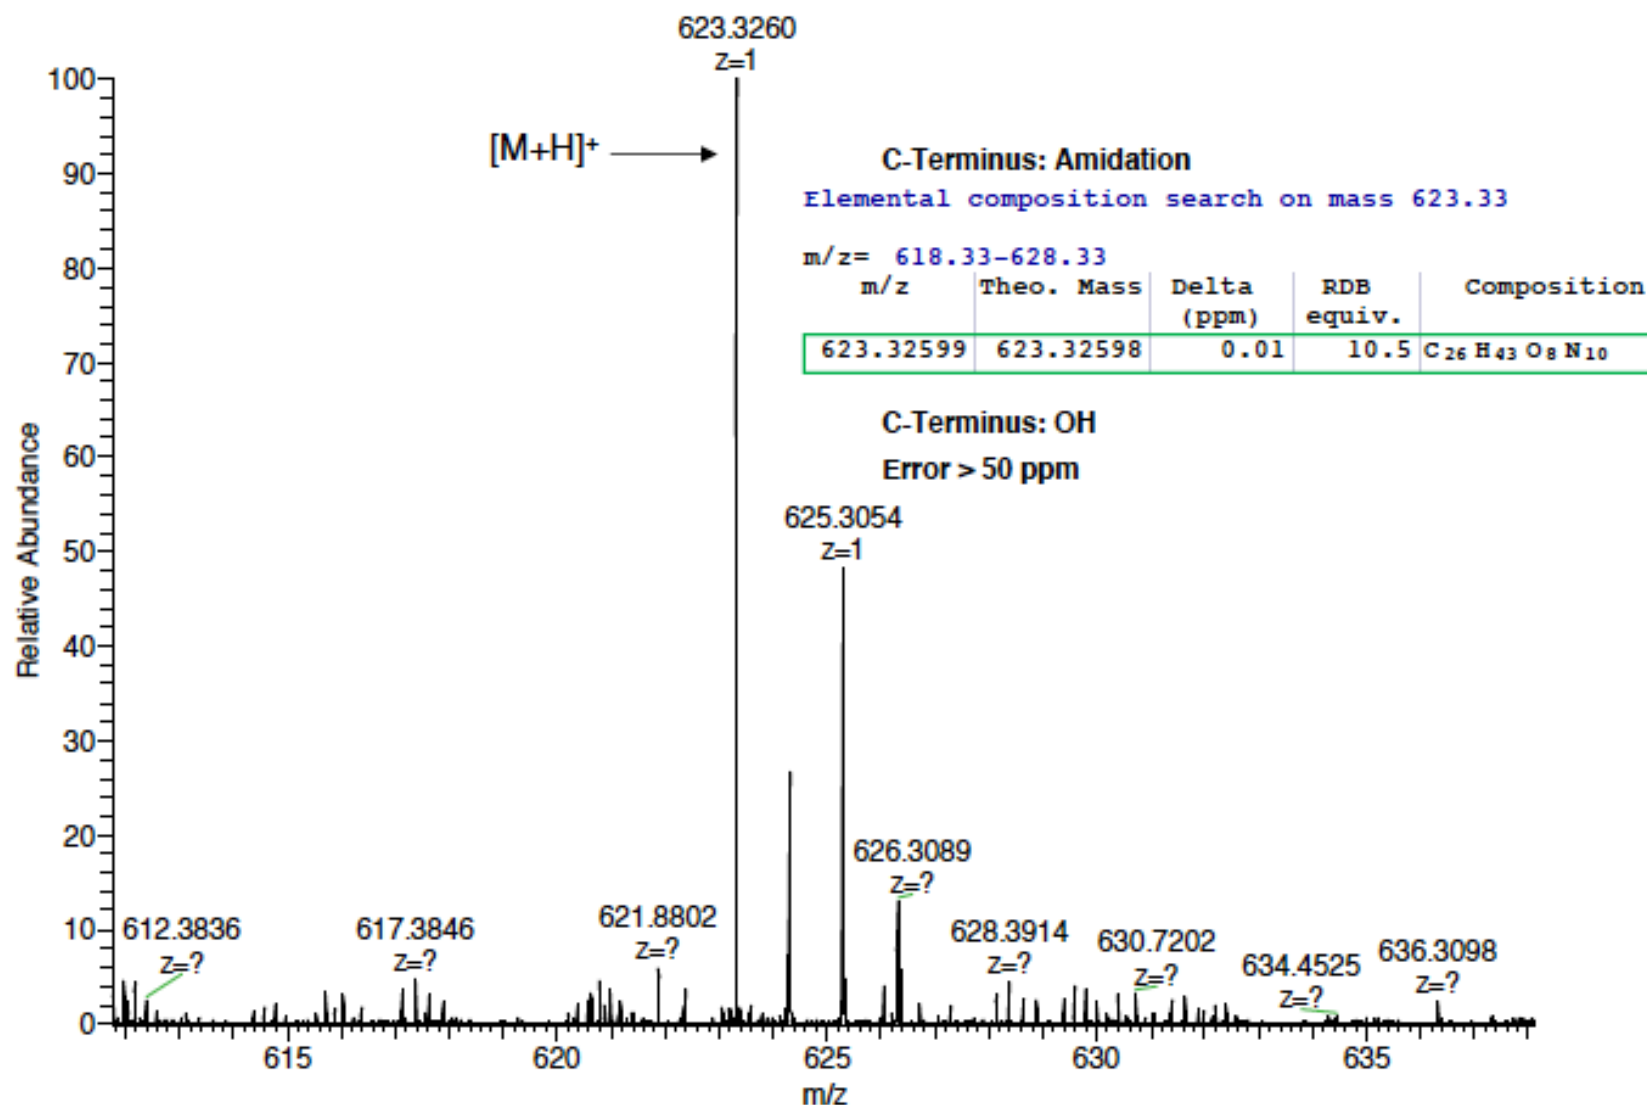

GsGrSy

## Zoom mass spectrum

m/z 610-633

AV: 1 NL: 1.10E5

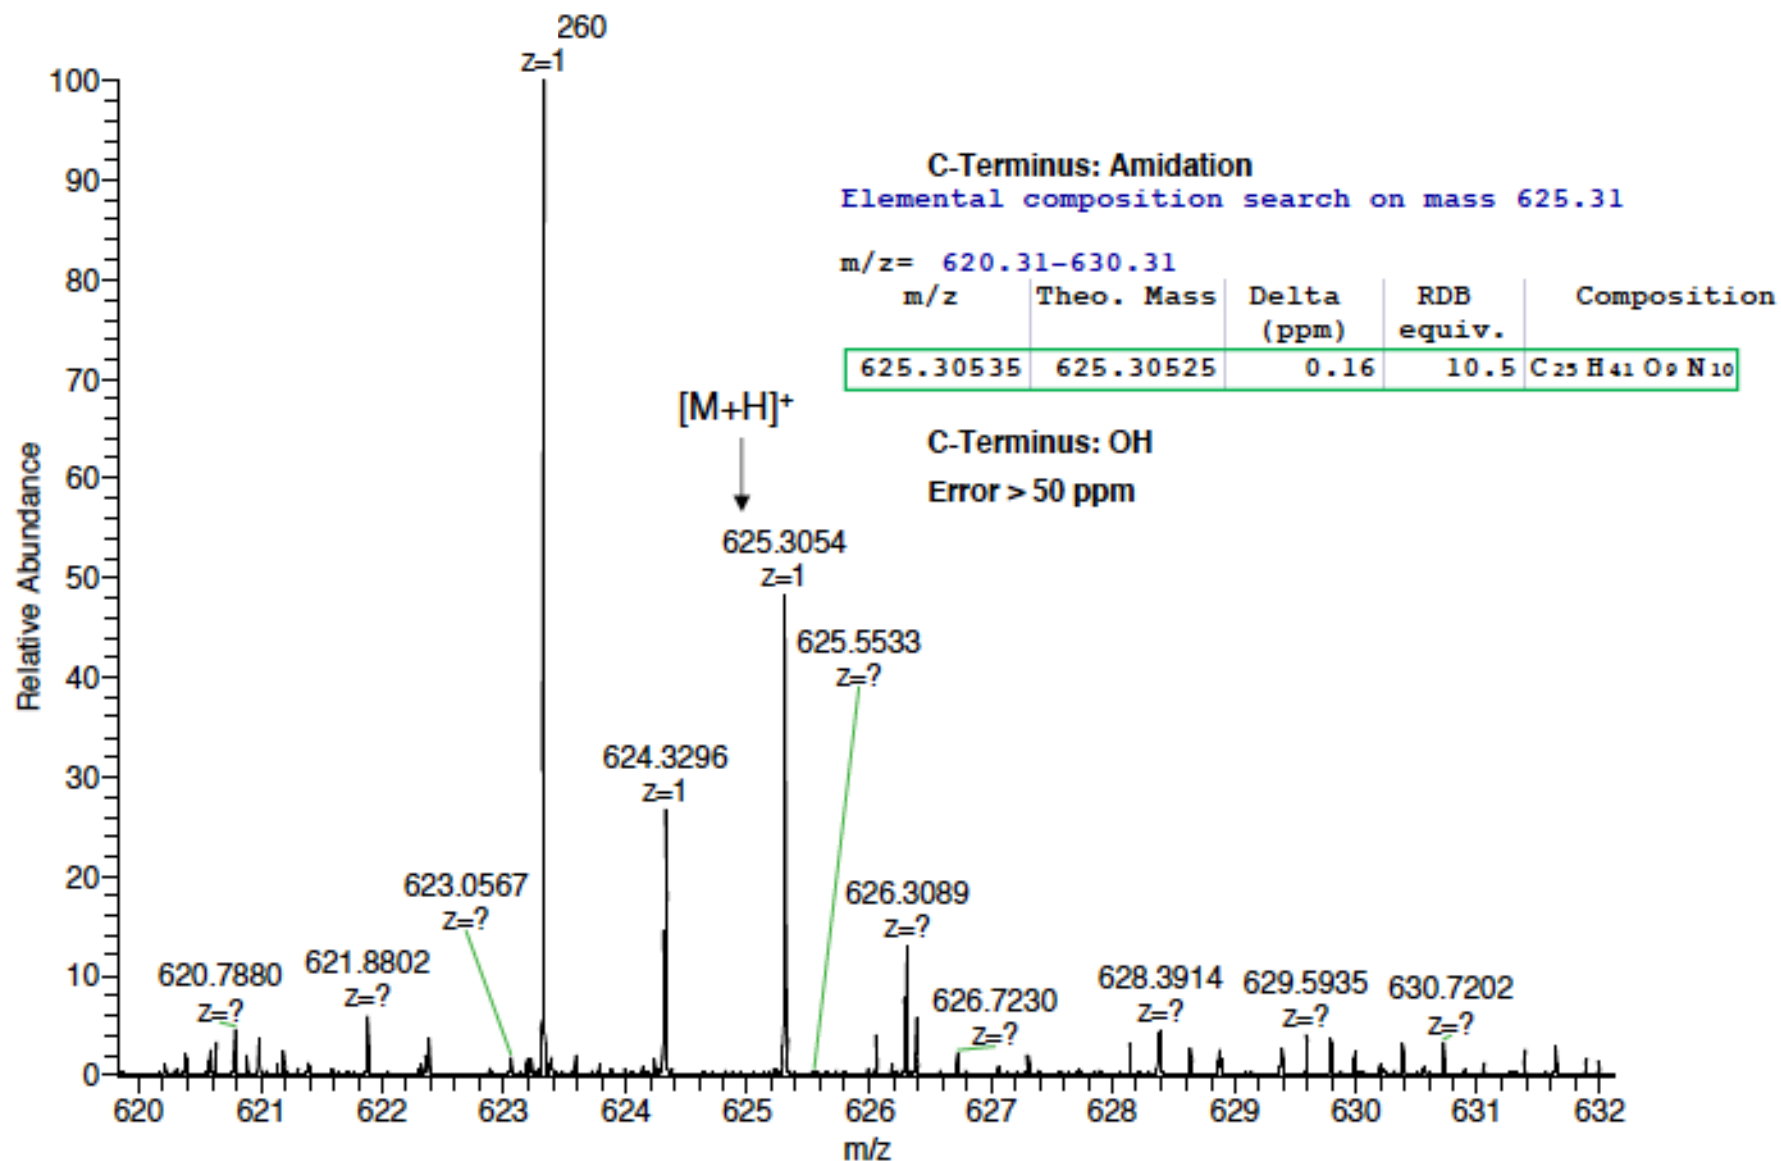

Gsrazy

# Zoom mass spectrum

m/z 630-650

AV: 1 NL: 8.93E4

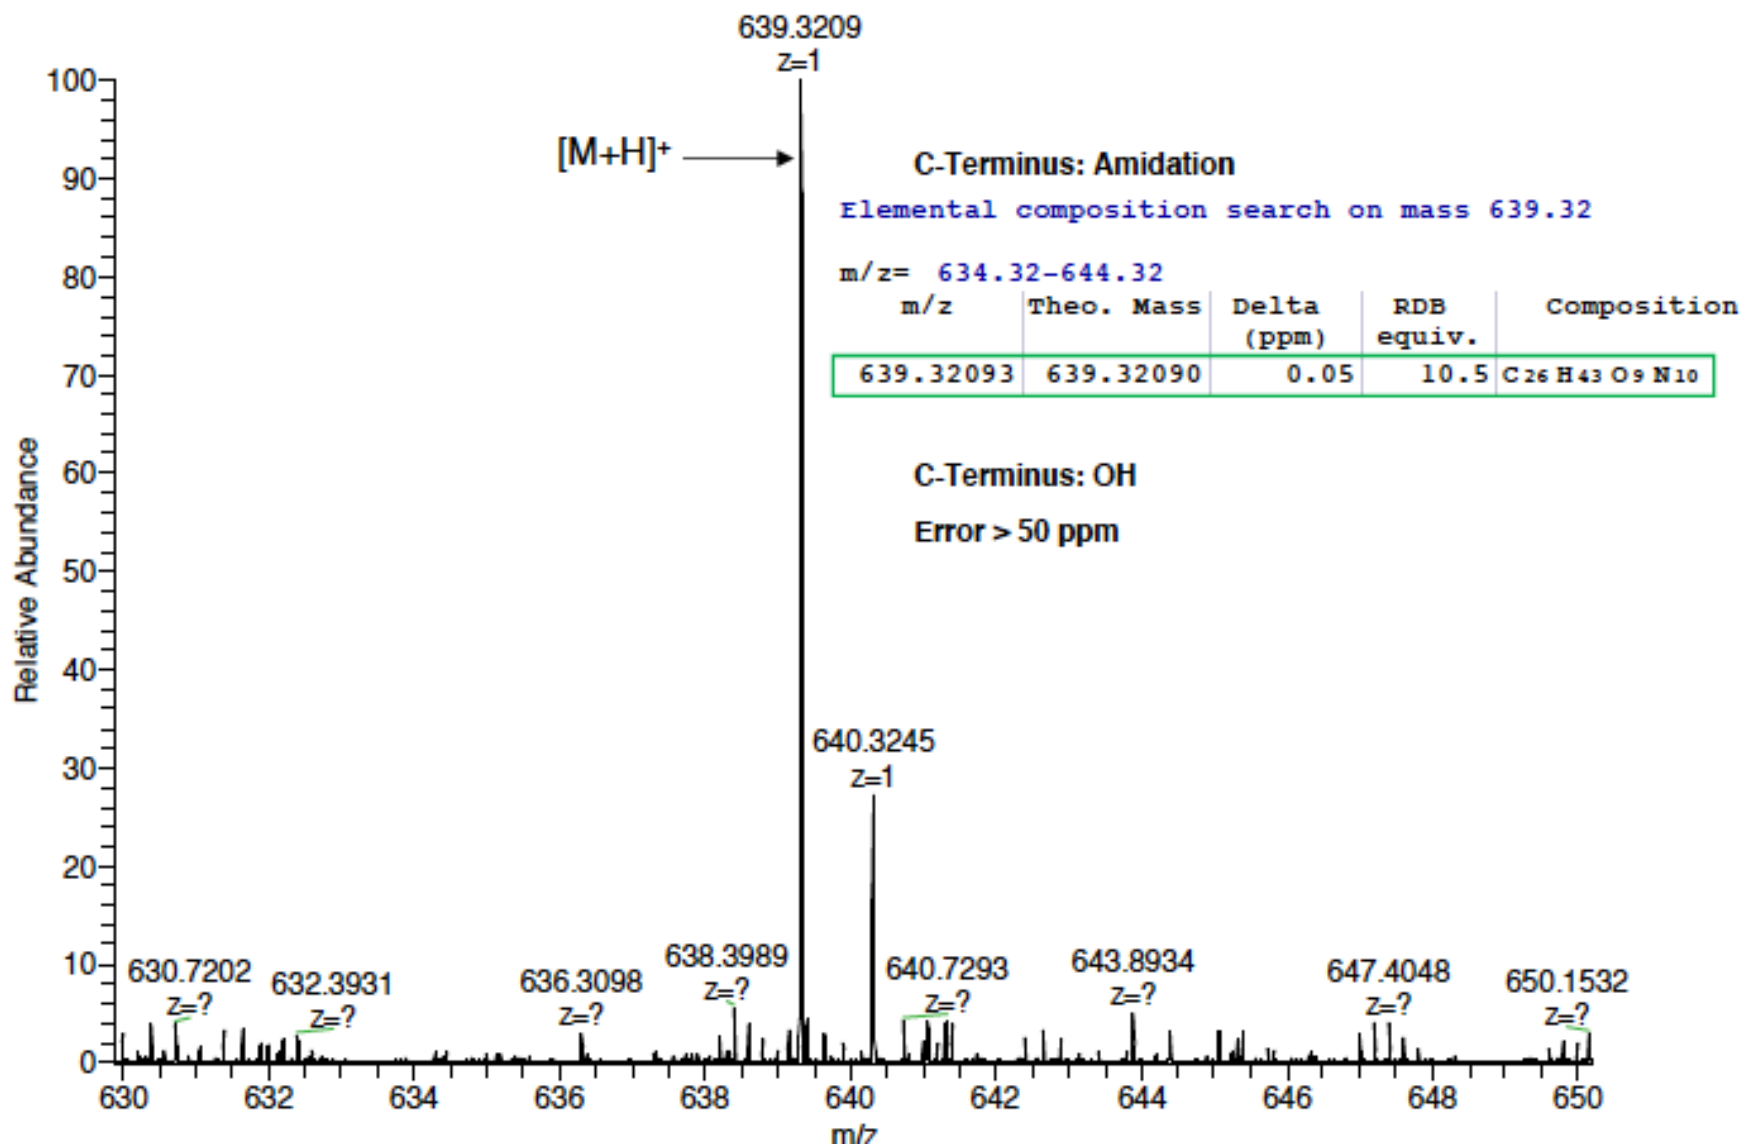



Zoom mass spectrum  
m/z 646-660

AV: 1 NL: 1.19E5

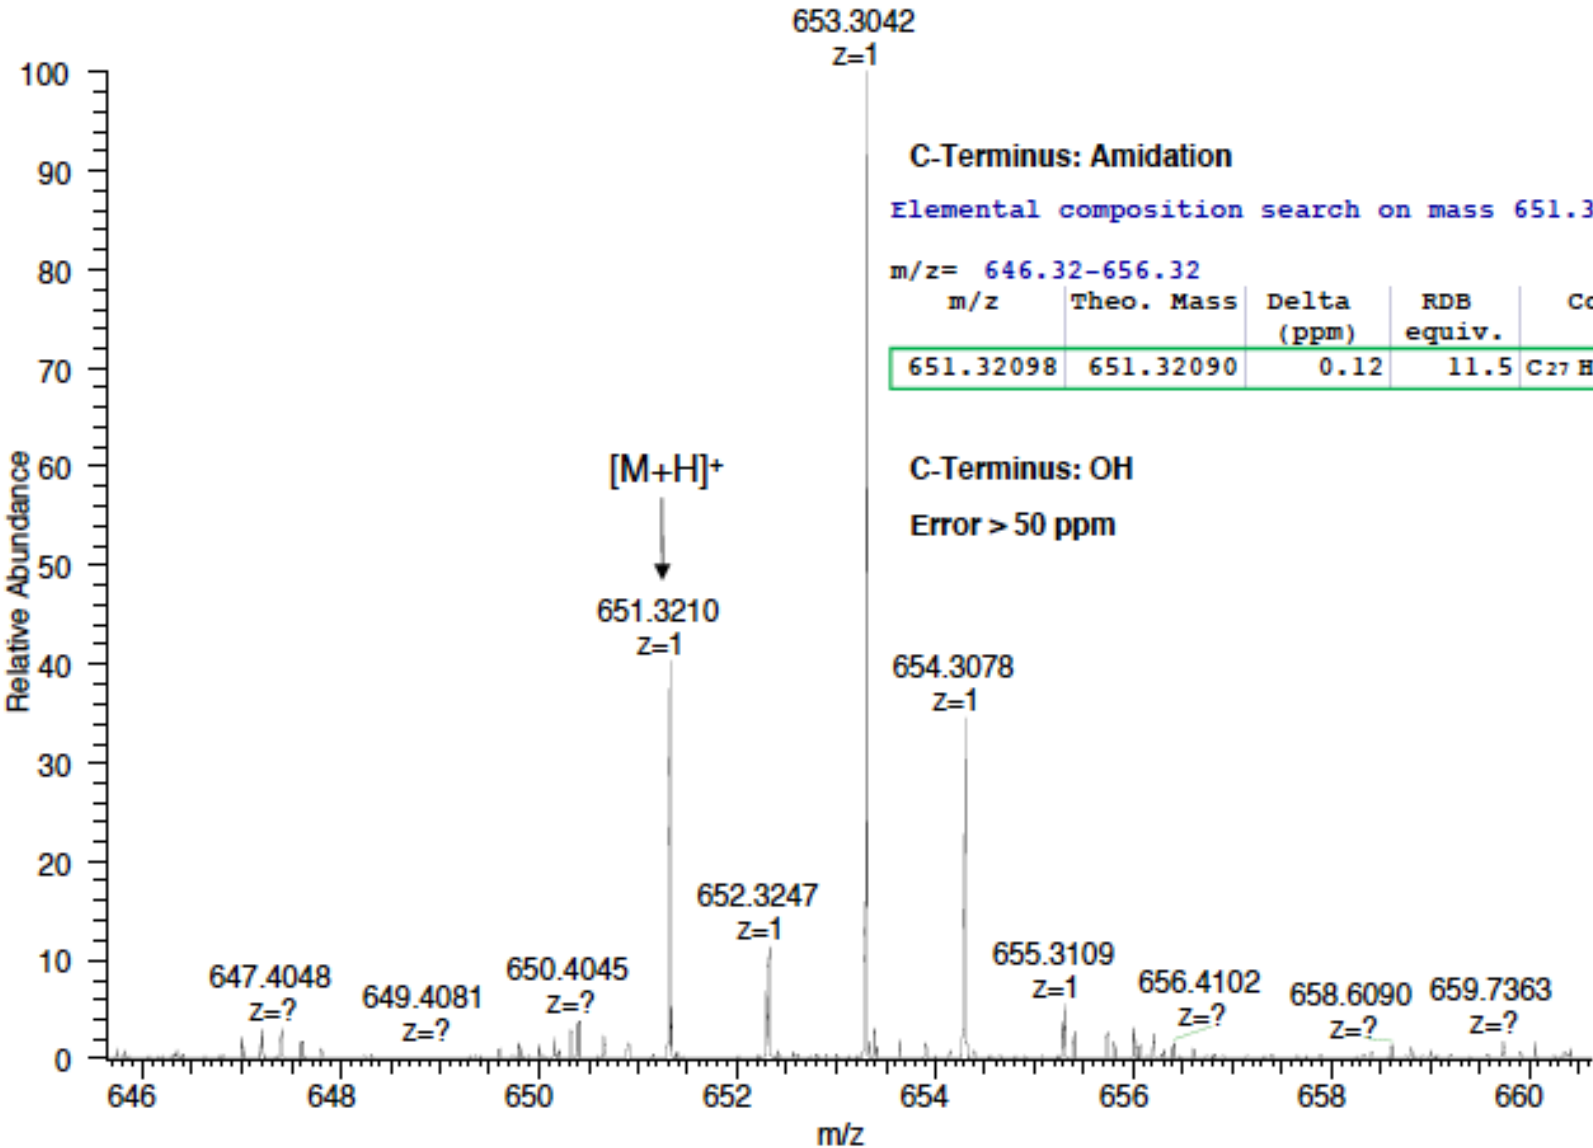

C-Terminus: Amidation

Elemental composition search on mass 651.32

m/z= 646.32-656.32

| m/z       | Theo. Mass | Delta (ppm) | RDB equiv. | Composition                                                    |
|-----------|------------|-------------|------------|----------------------------------------------------------------|
| 651.32098 | 651.32090  | 0.12        | 11.5       | C <sub>27</sub> H <sub>43</sub> O <sub>9</sub> N <sub>10</sub> |

C-Terminus: OH

Error > 50 ppm

Zoom mass spectrum  
m/z 646-660

AV: 1 NL: 1.19E5

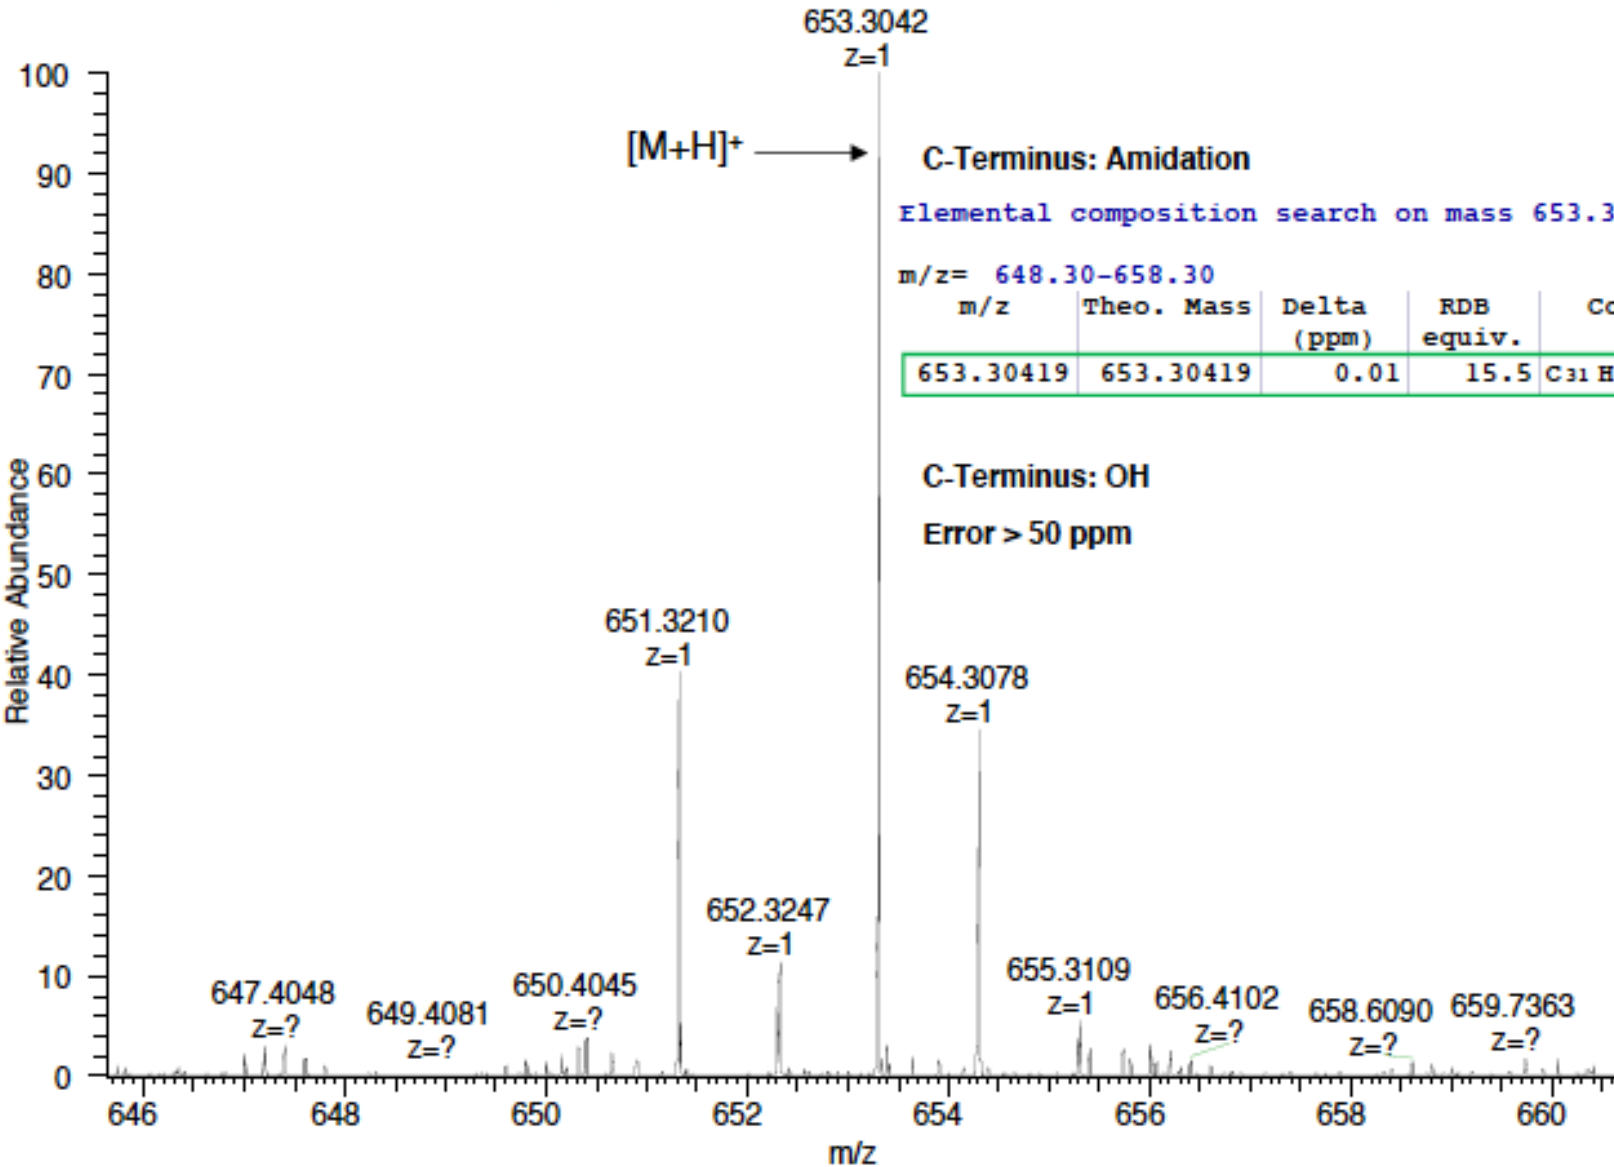

Geraay  
GeGrSy

Zoom mass spectrum  
m/z 646-660  
AV: 1 NL: 9.83E4

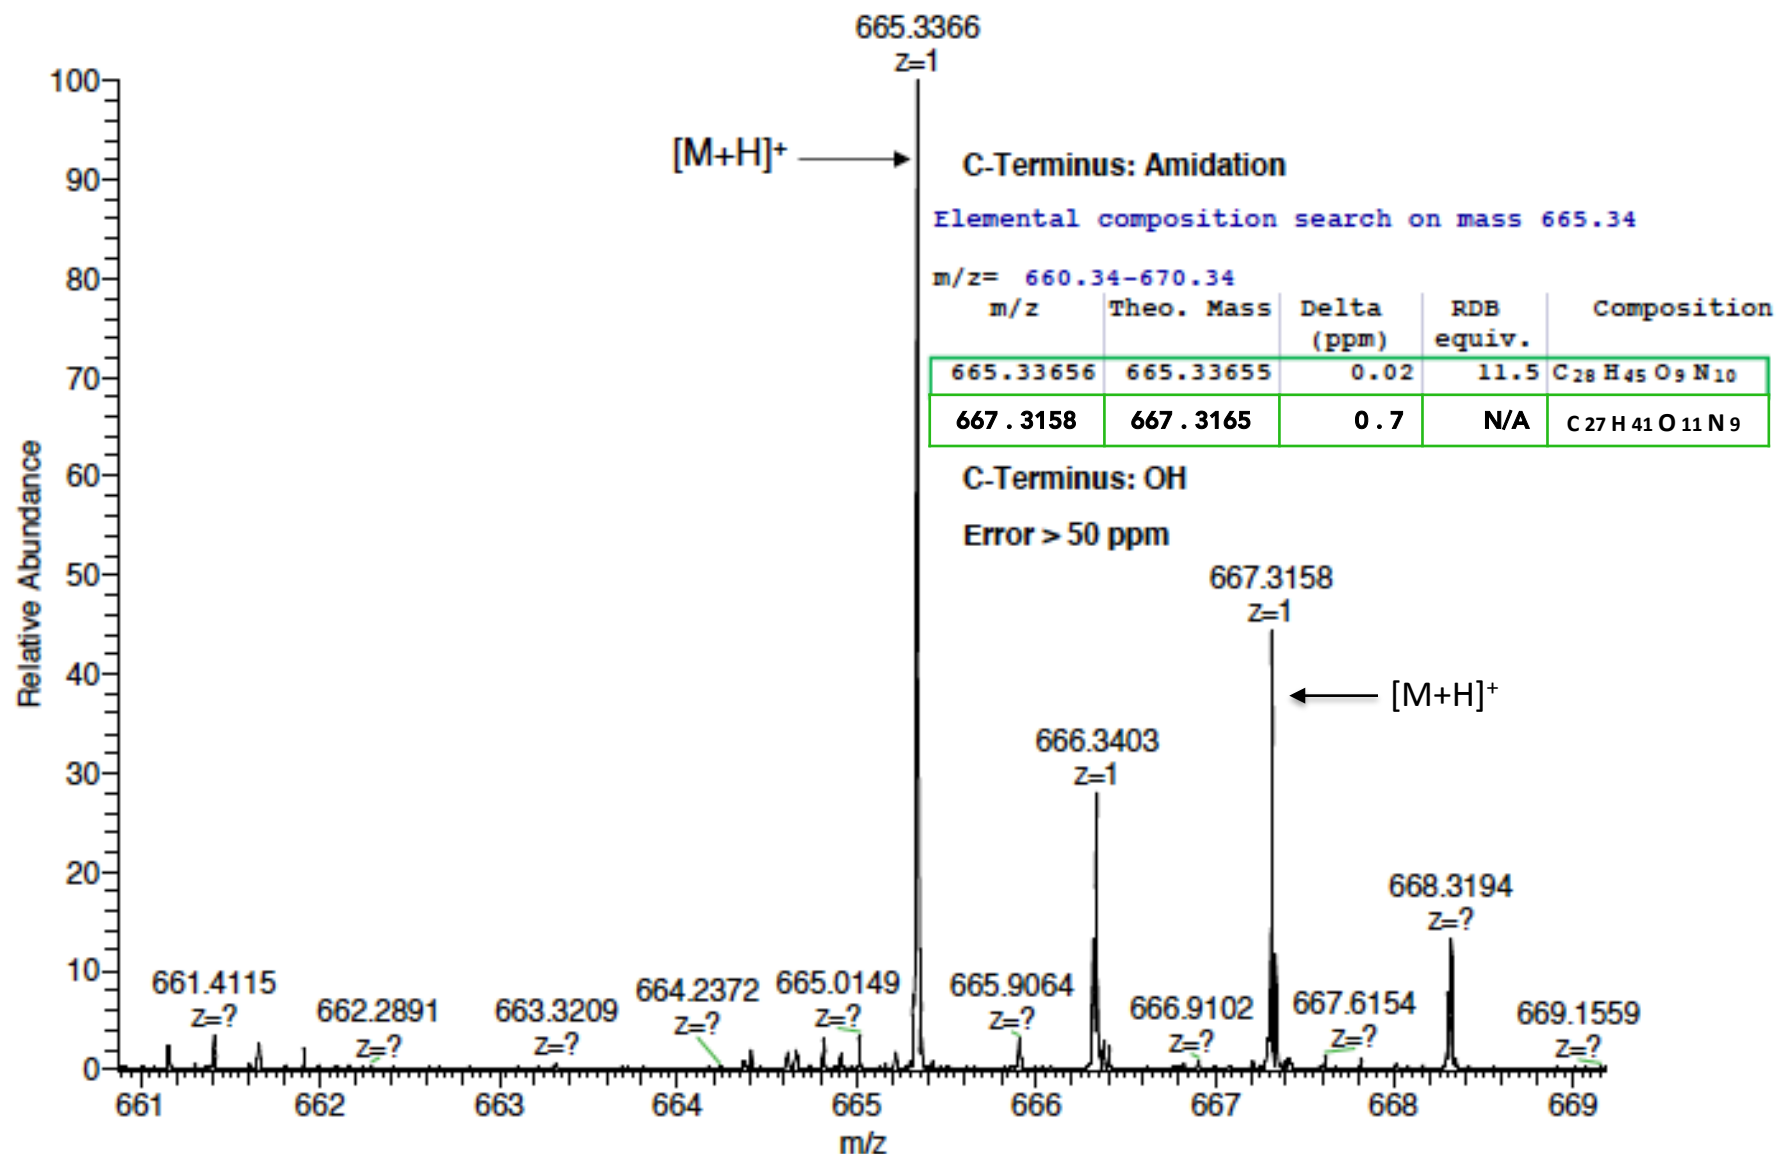

Zoom mass spectrum  
m/z 646-660

AV: 1 NL: 1.17E5

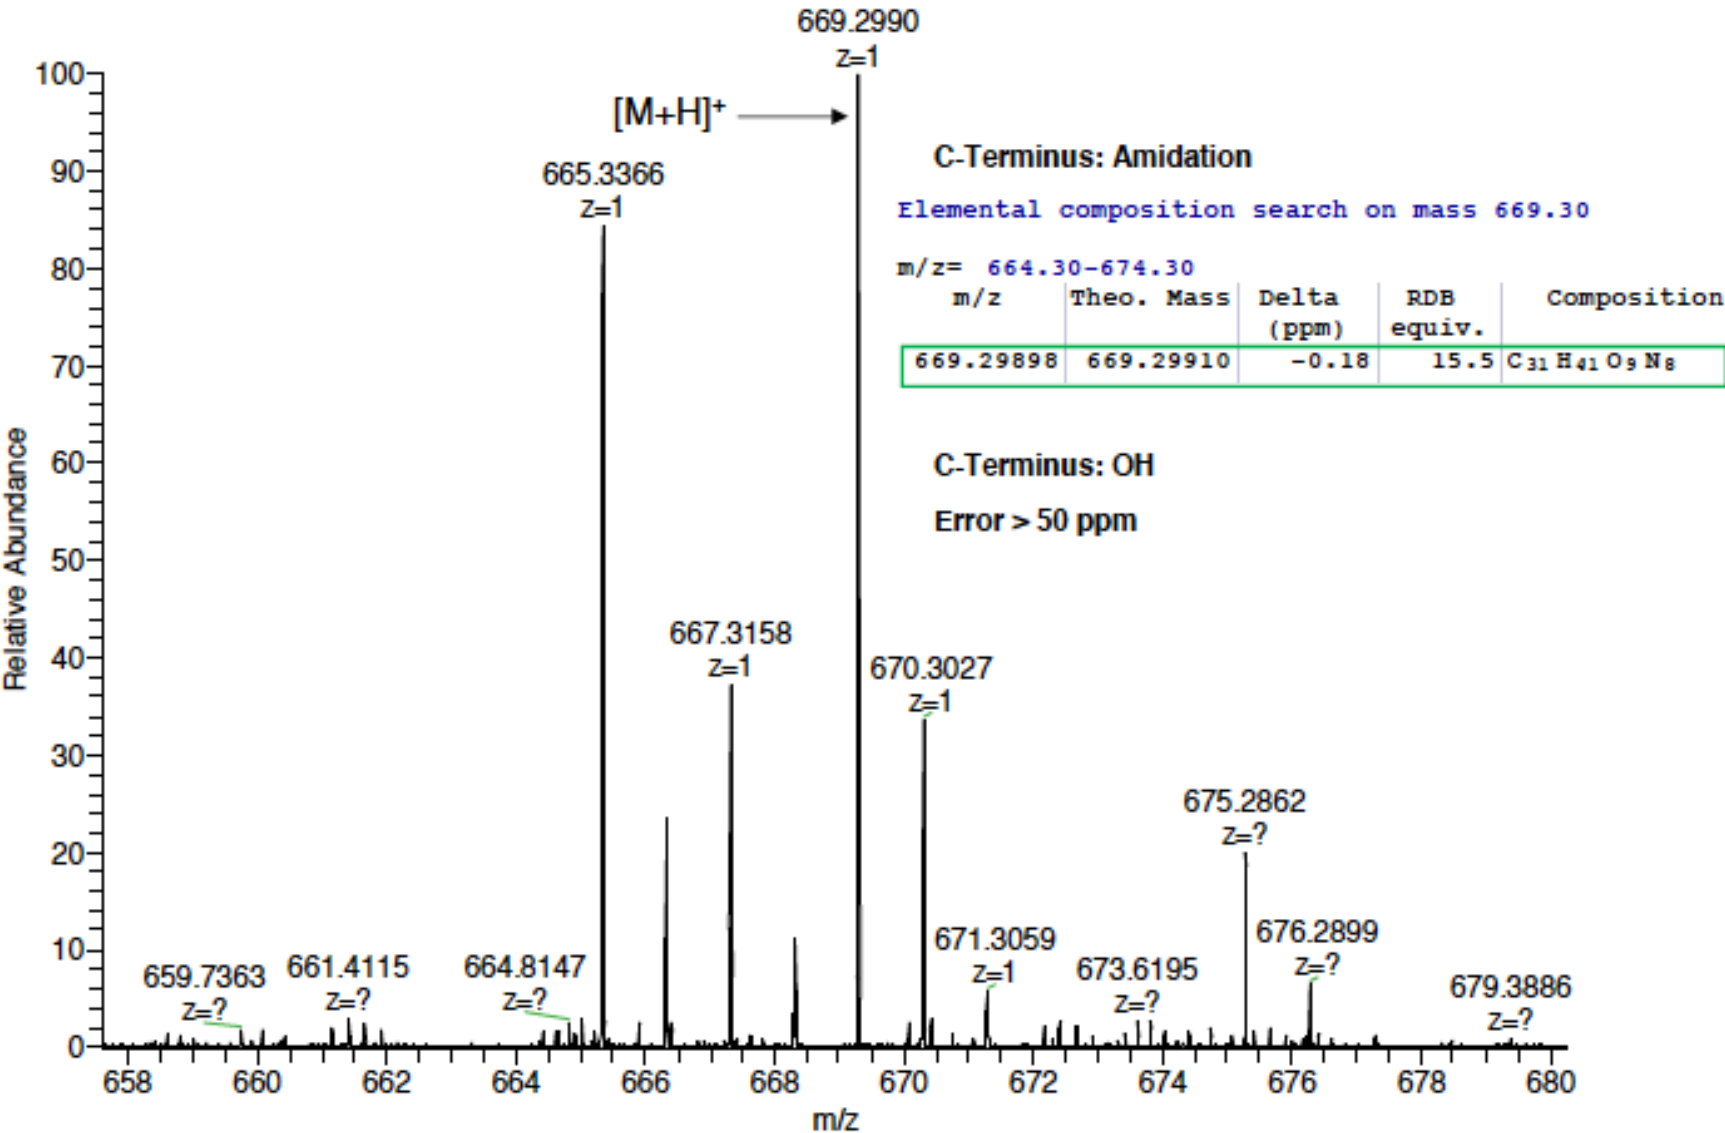

Gerasy

# Zoom mass spectrum m/z 646-660

AV: 1 NL: 8.54E4

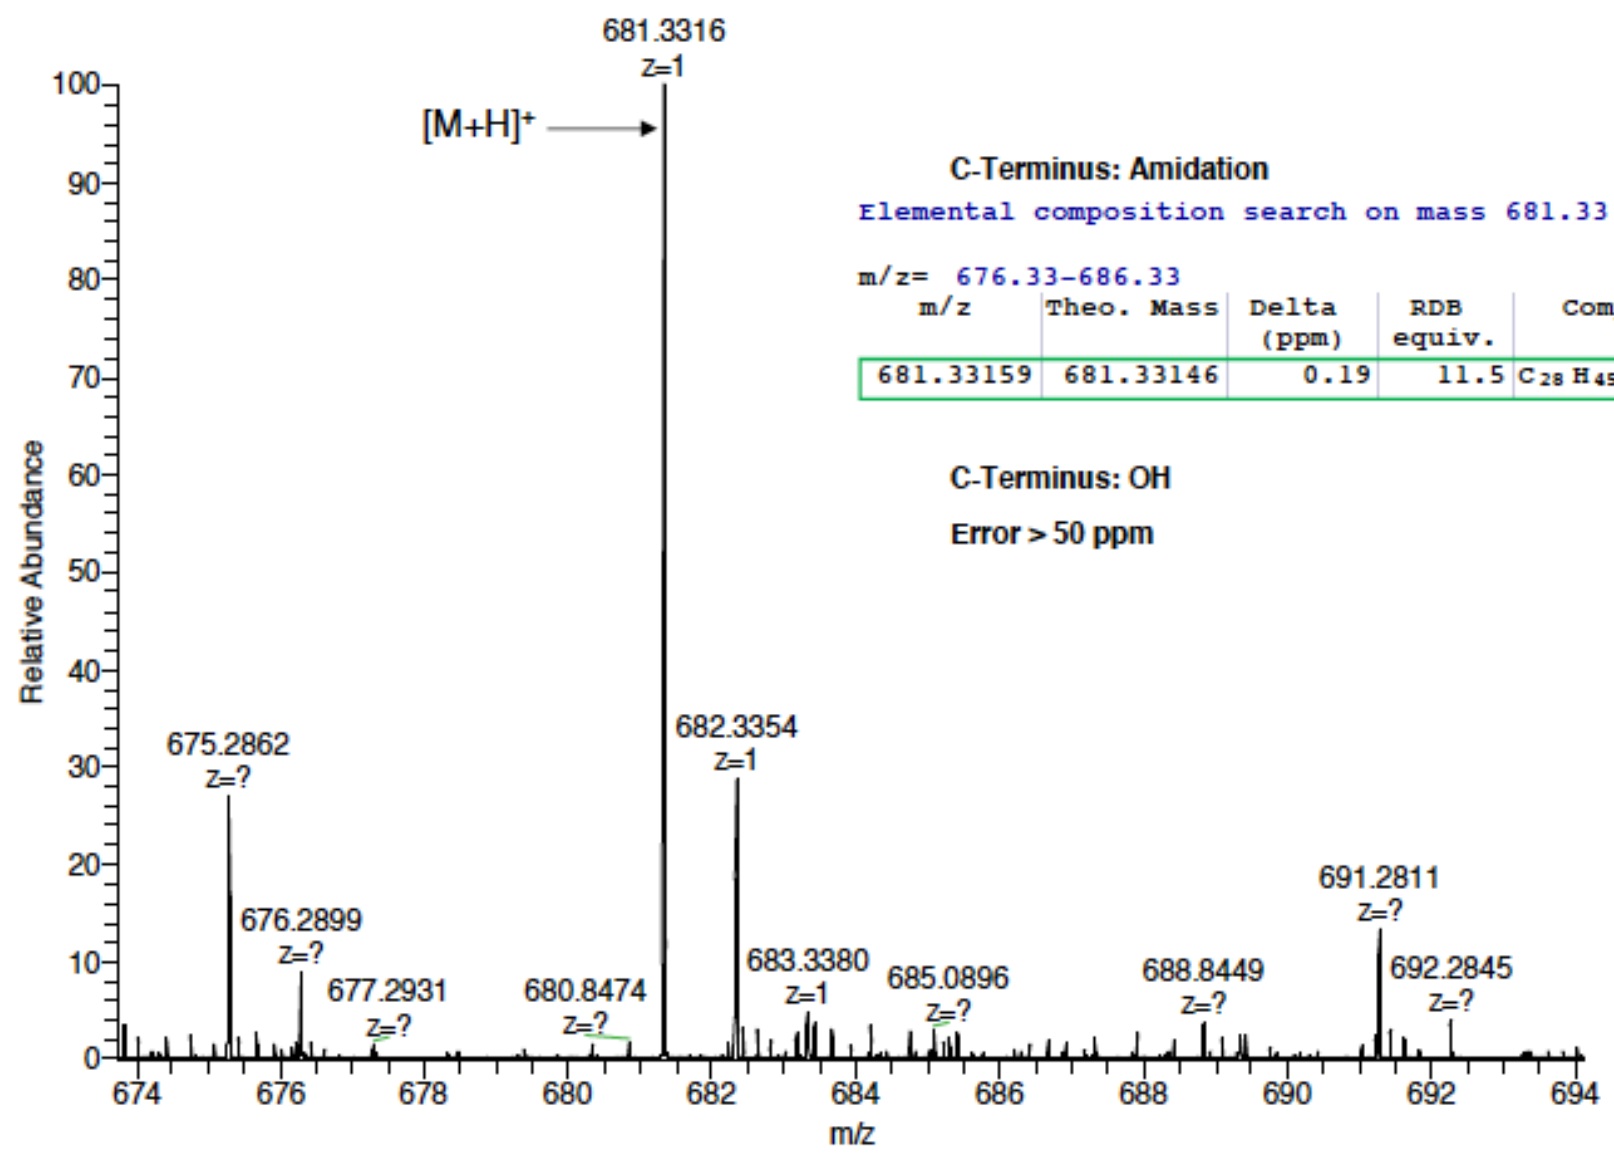

C-Terminus: Amidation  
Elemental composition search on mass 681.33

m/z= 676.33-686.33

| m/z       | Theo. Mass | Delta (ppm) | RDB equiv. | Composition                                                     |
|-----------|------------|-------------|------------|-----------------------------------------------------------------|
| 681.33159 | 681.33146  | 0.19        | 11.5       | C <sub>28</sub> H <sub>45</sub> O <sub>10</sub> N <sub>10</sub> |

C-Terminus: OH  
Error > 50 ppm

Zoom mass spectrum  
m/z 684-708

AV: 1 NL: 1.34E5

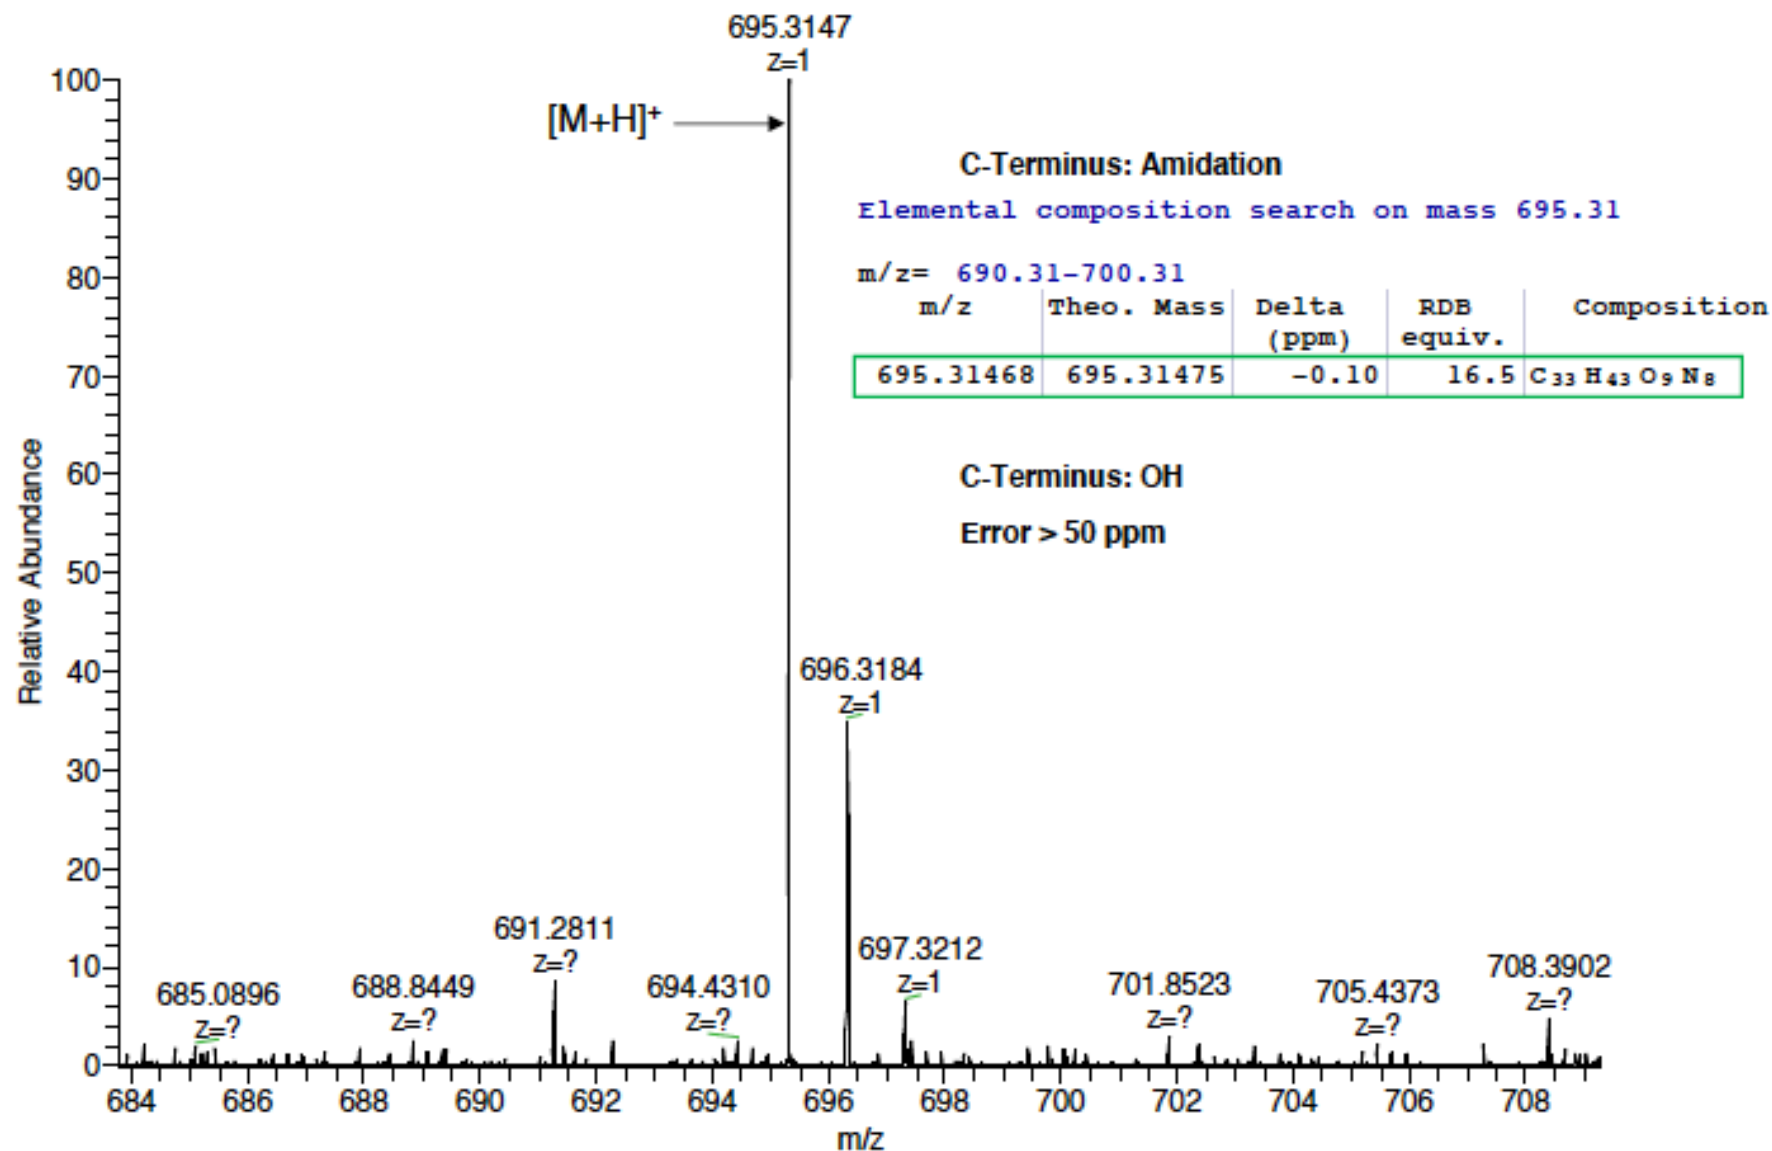

Zoom mass spectrum  
m/z 684-708

AV: 1 NL: 1.34E5

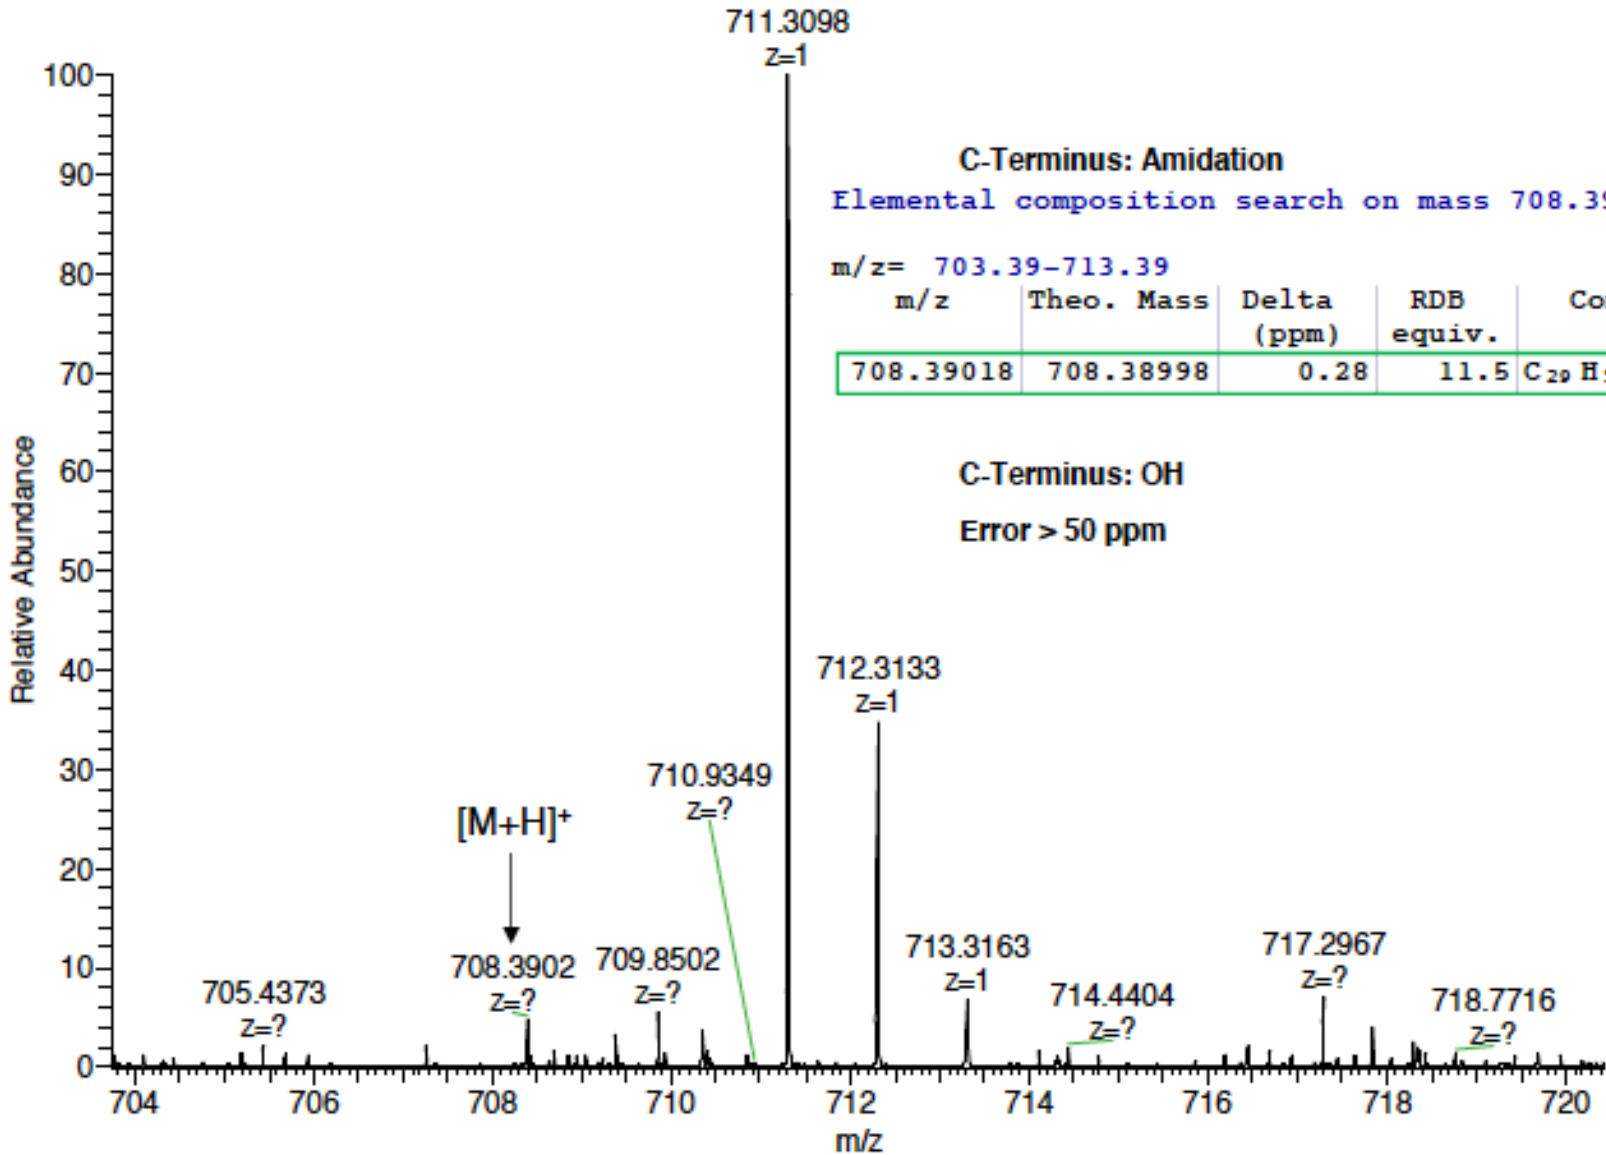

Zoom mass spectrum  
m/z 698-735

AV: 1 NL: 1.34E5

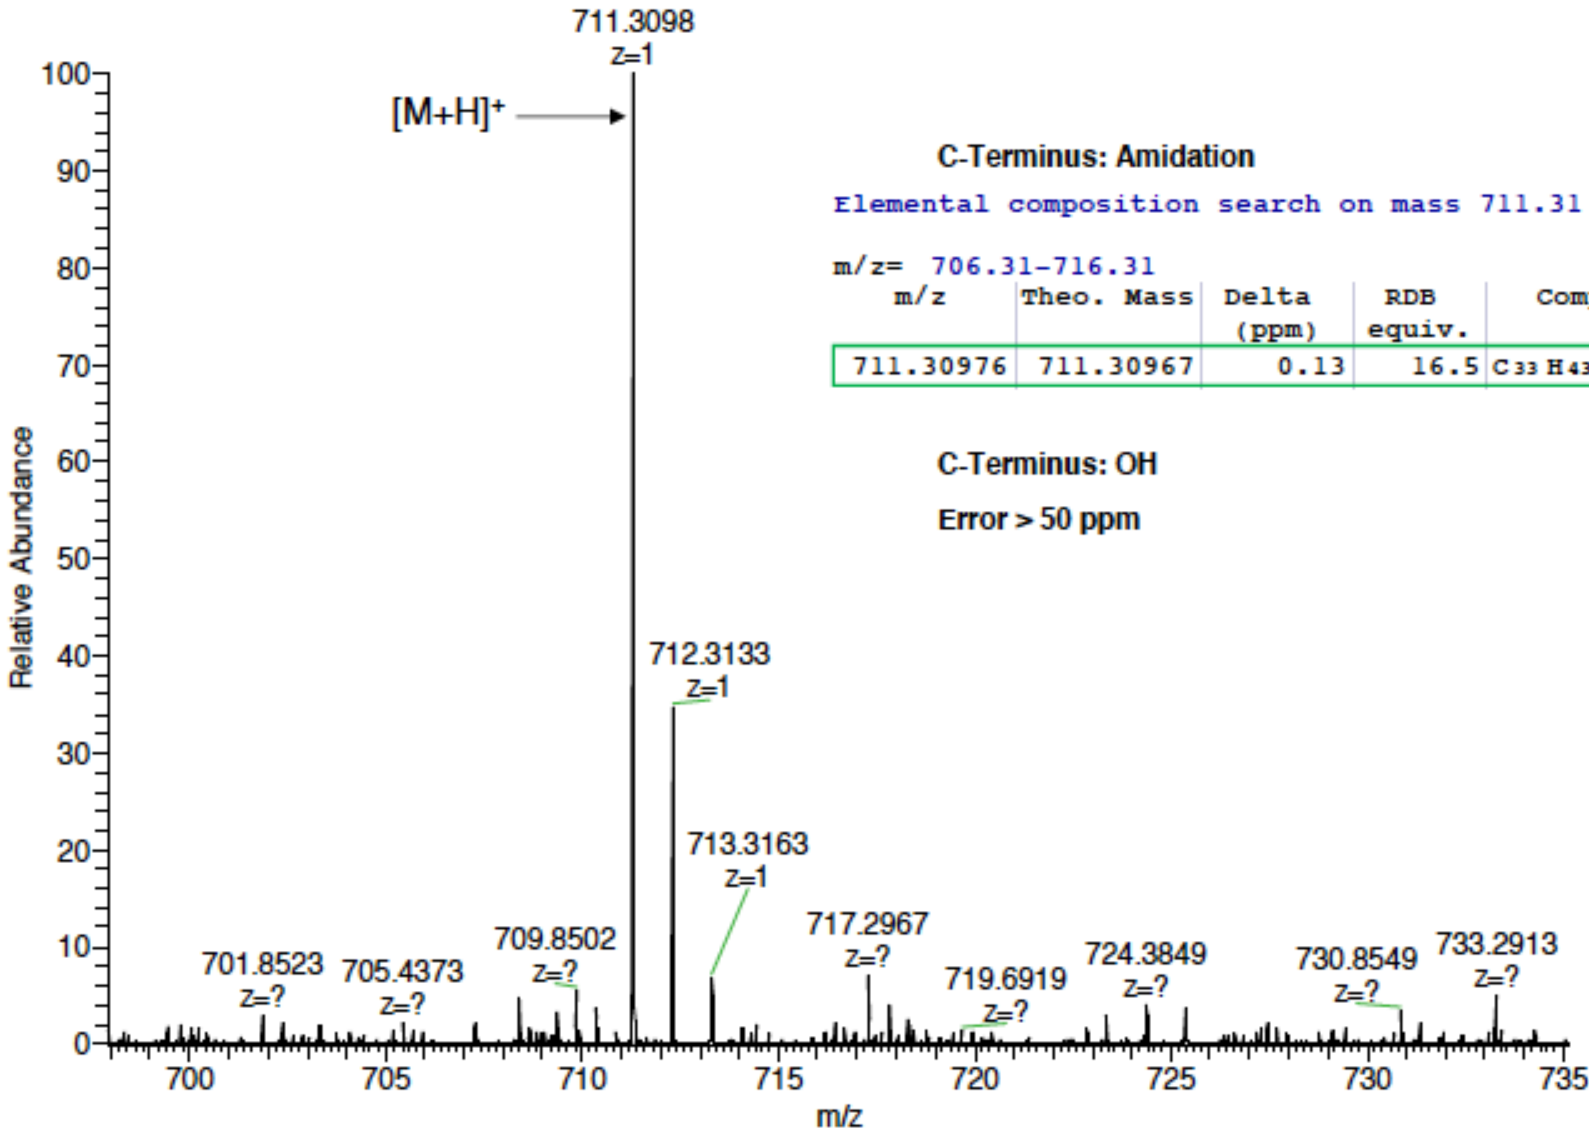

C-Terminus: Amidation

Elemental composition search on mass 711.31

m/z= 706.31-716.31

| m/z       | Theo. Mass | Delta (ppm) | RDB equiv. | Composition                                                    |
|-----------|------------|-------------|------------|----------------------------------------------------------------|
| 711.30976 | 711.30967  | 0.13        | 16.5       | C <sub>33</sub> H <sub>43</sub> O <sub>10</sub> N <sub>8</sub> |

C-Terminus: OH

Error > 50 ppm



## Zoom mass spectrum

m/z 719-745

AV: 1 NL: 1.07E5

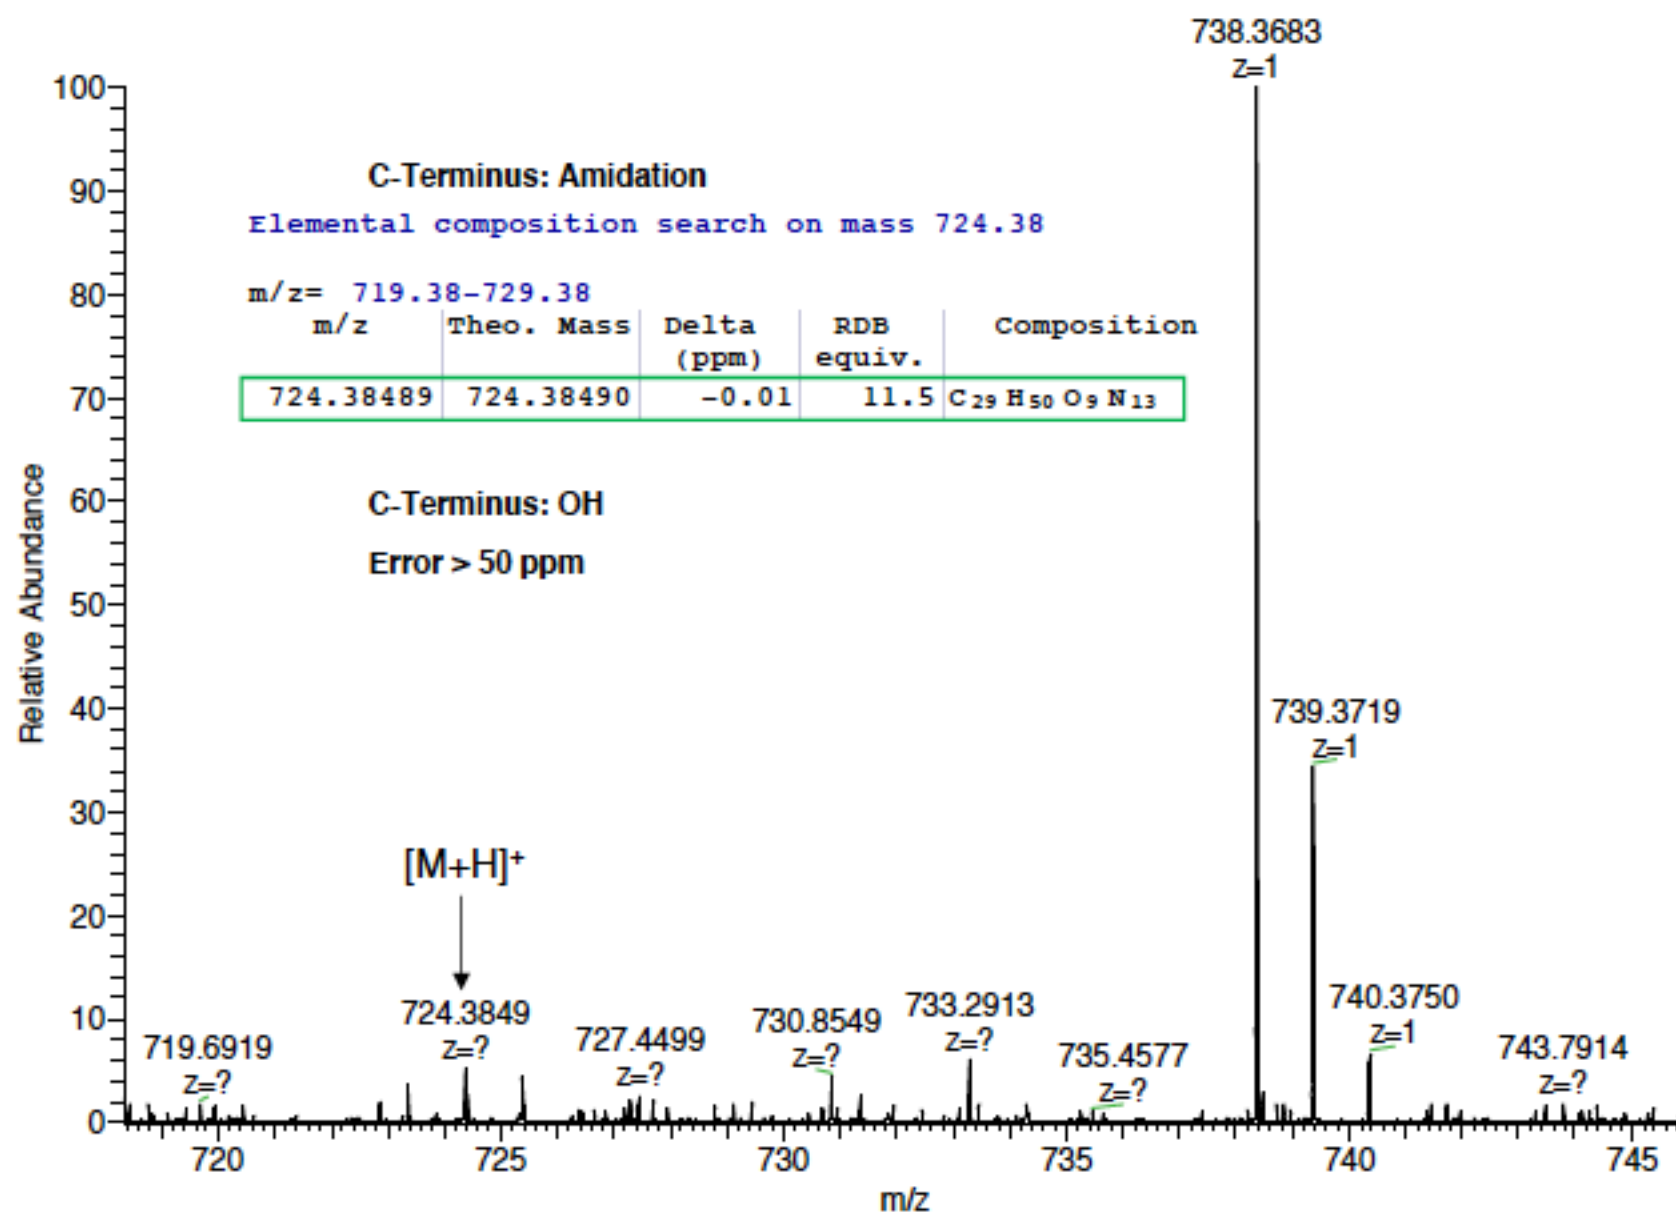

Zoom mass spectrum  
m/z 726-750

AV: 1 NL: 1.07E5

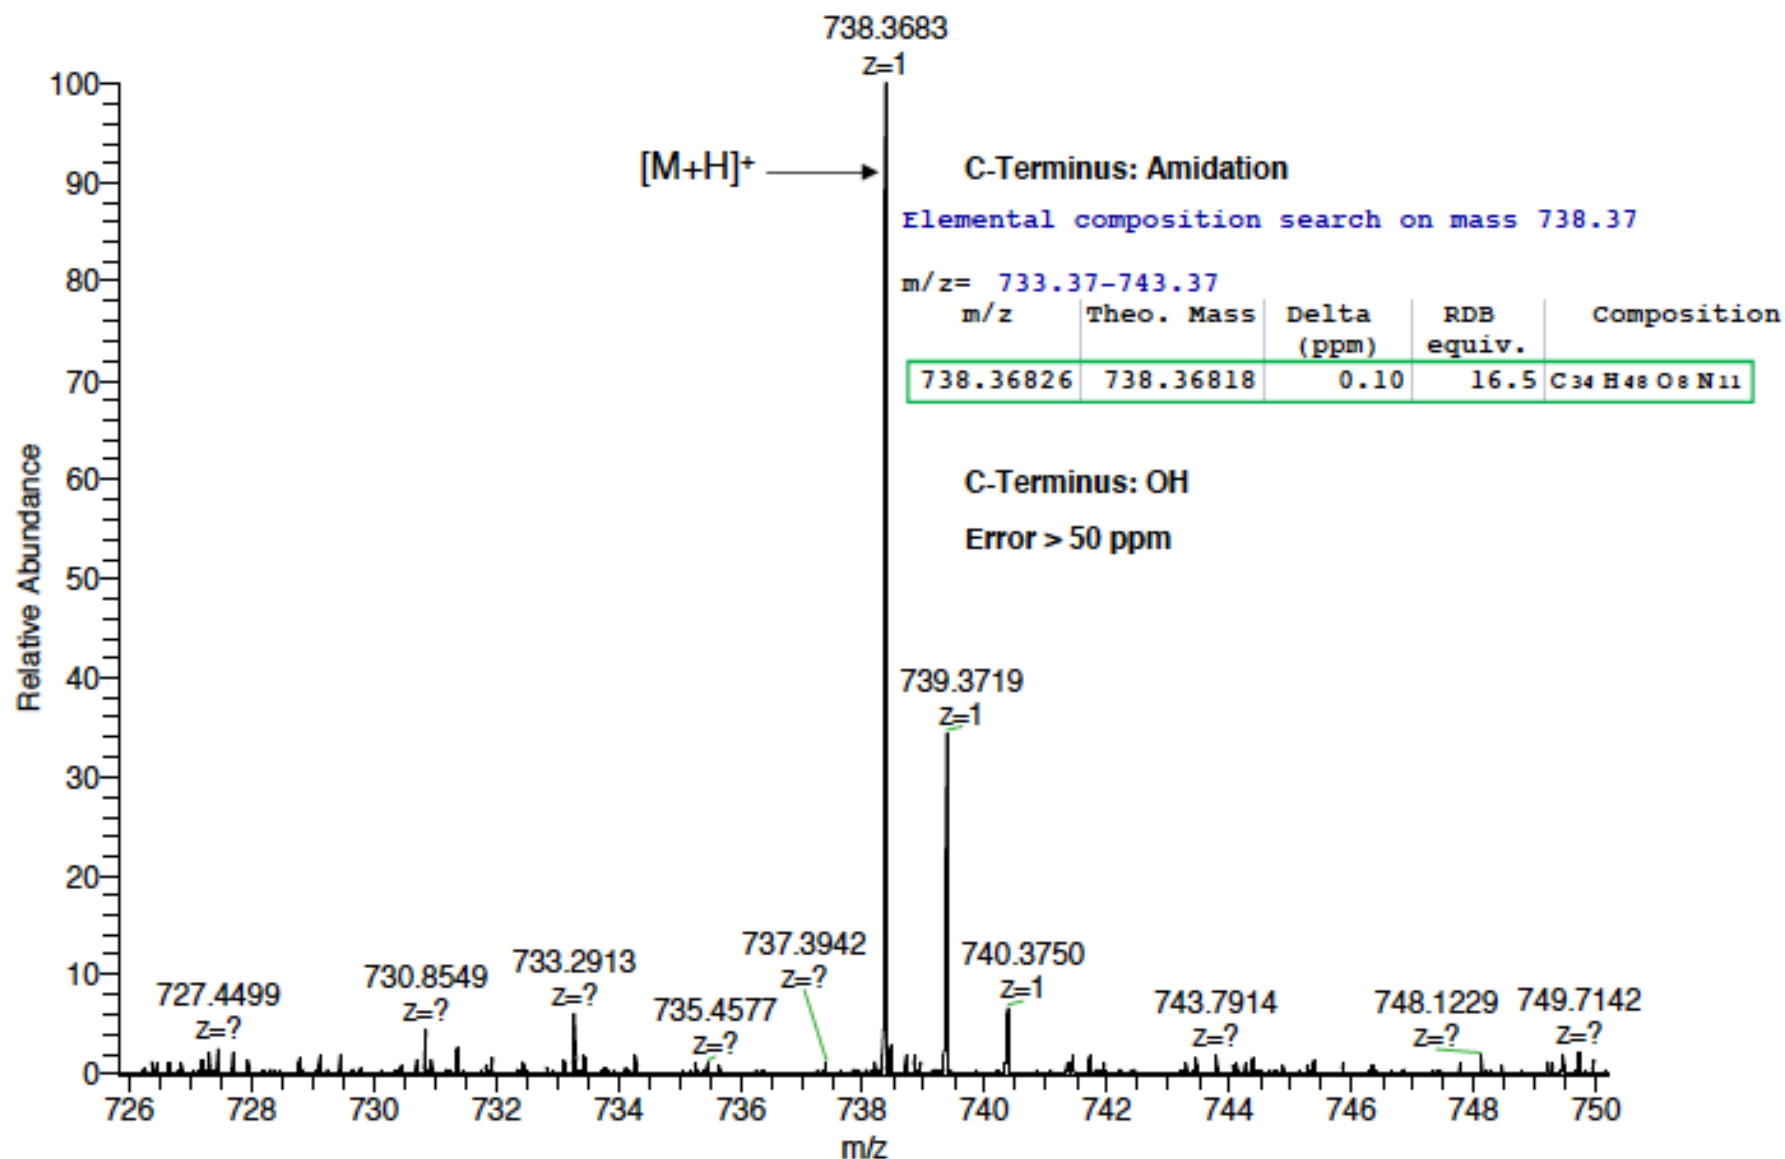

## Zoom mass spectrum

m/z 719-745

AV: 1 NL: 1.63E5

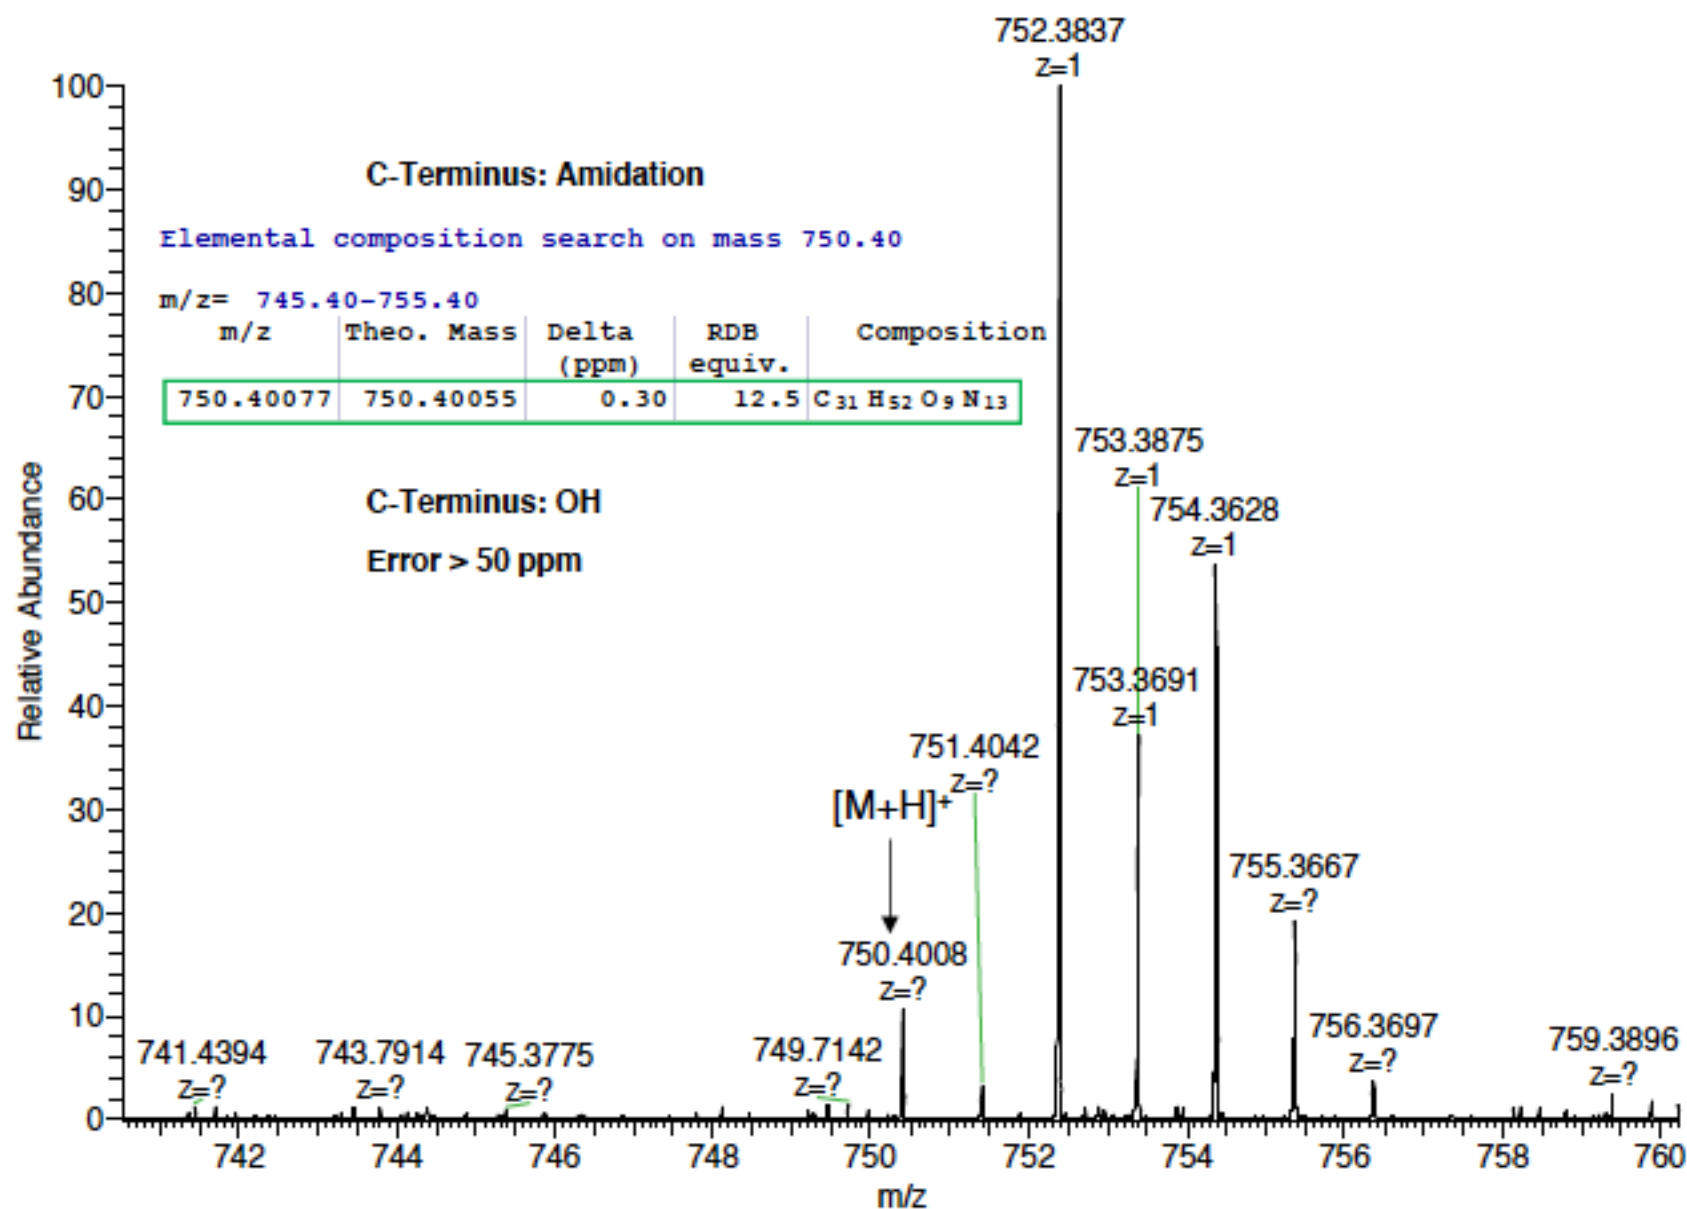

Zoom mass spectrum  
m/z 740-766

AV: 1 NL: 1.63E5

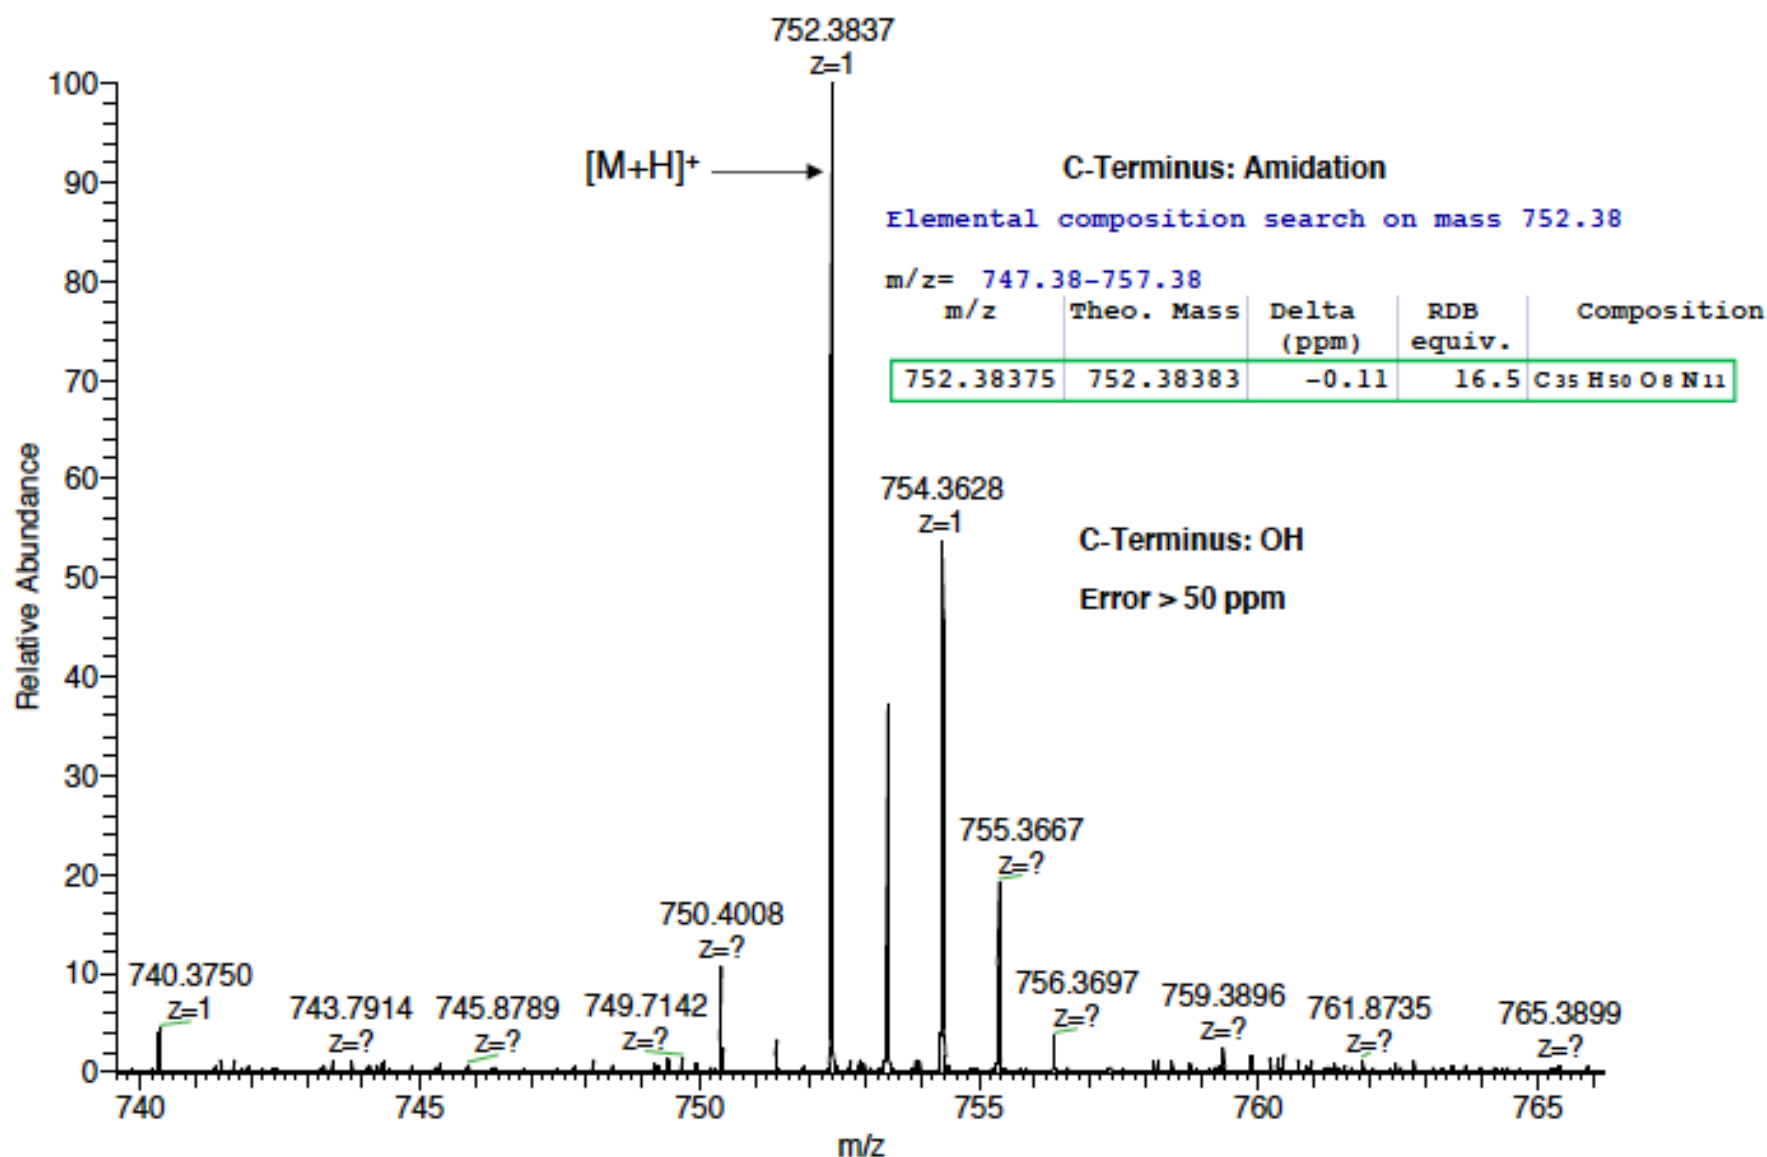

wsGrsy

# Zoom mass spectrum

m/z 748-766

AV: 1 NL: 1.63E5

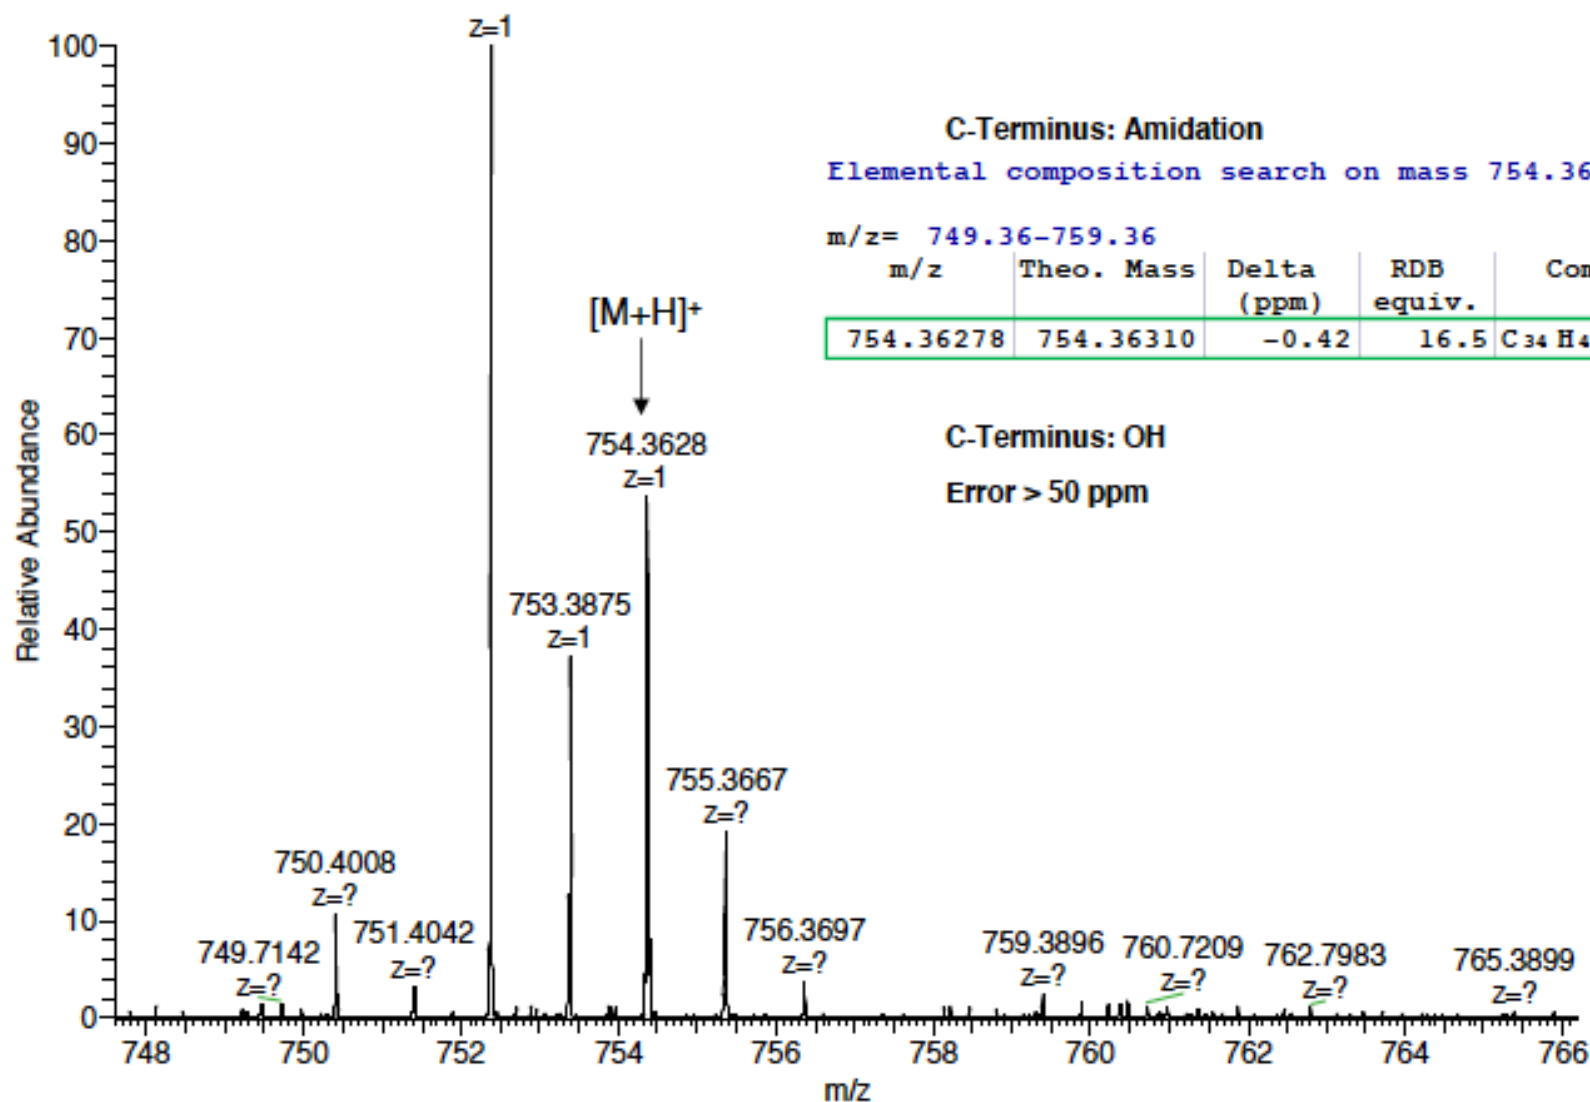

Zoom mass spectrum  
m/z 760-779

AV: 1 NL: 1.27E5

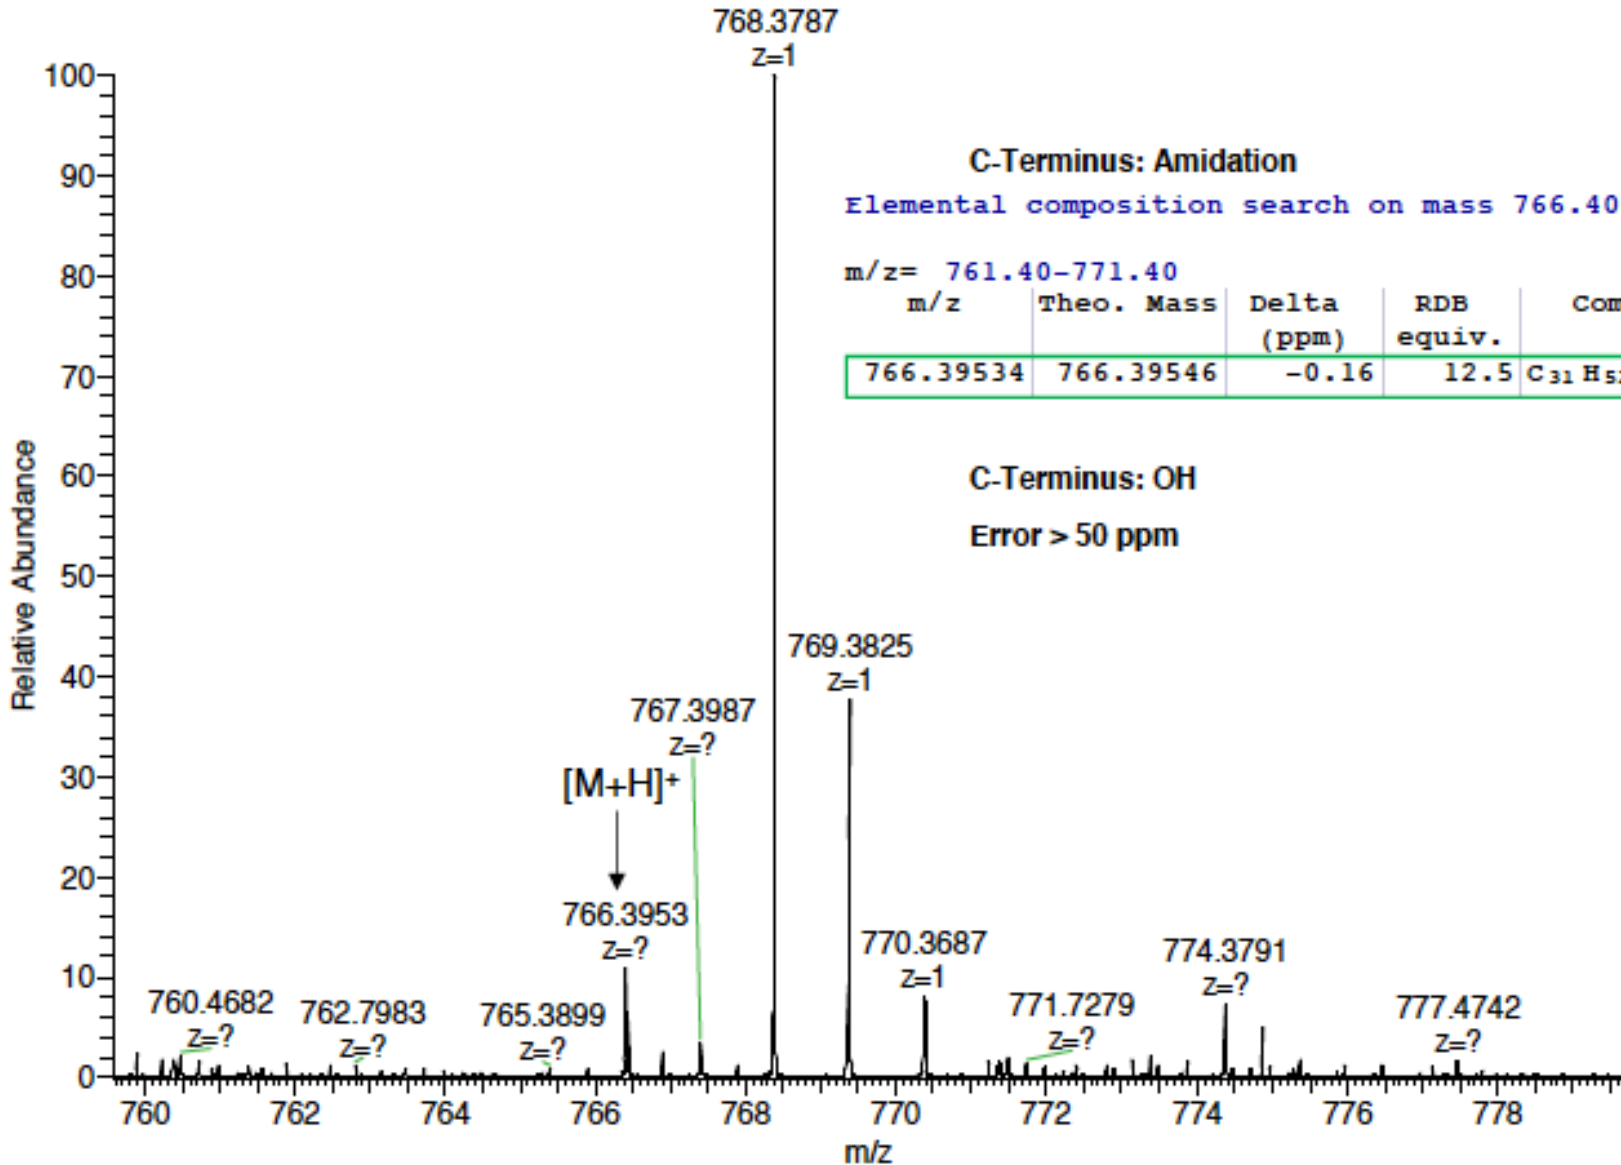

C-Terminus: Amidation  
Elemental composition search on mass 766.40

m/z= 761.40-771.40

| m/z       | Theo. Mass | Delta (ppm) | RDB equiv. | Composition                                                     |
|-----------|------------|-------------|------------|-----------------------------------------------------------------|
| 766.39534 | 766.39546  | -0.16       | 12.5       | C <sub>31</sub> H <sub>52</sub> O <sub>10</sub> N <sub>13</sub> |

C-Terminus: OH  
Error > 50 ppm

Zoom mass spectrum  
m/z 762-779

AV: 1 NL: 1.27E5

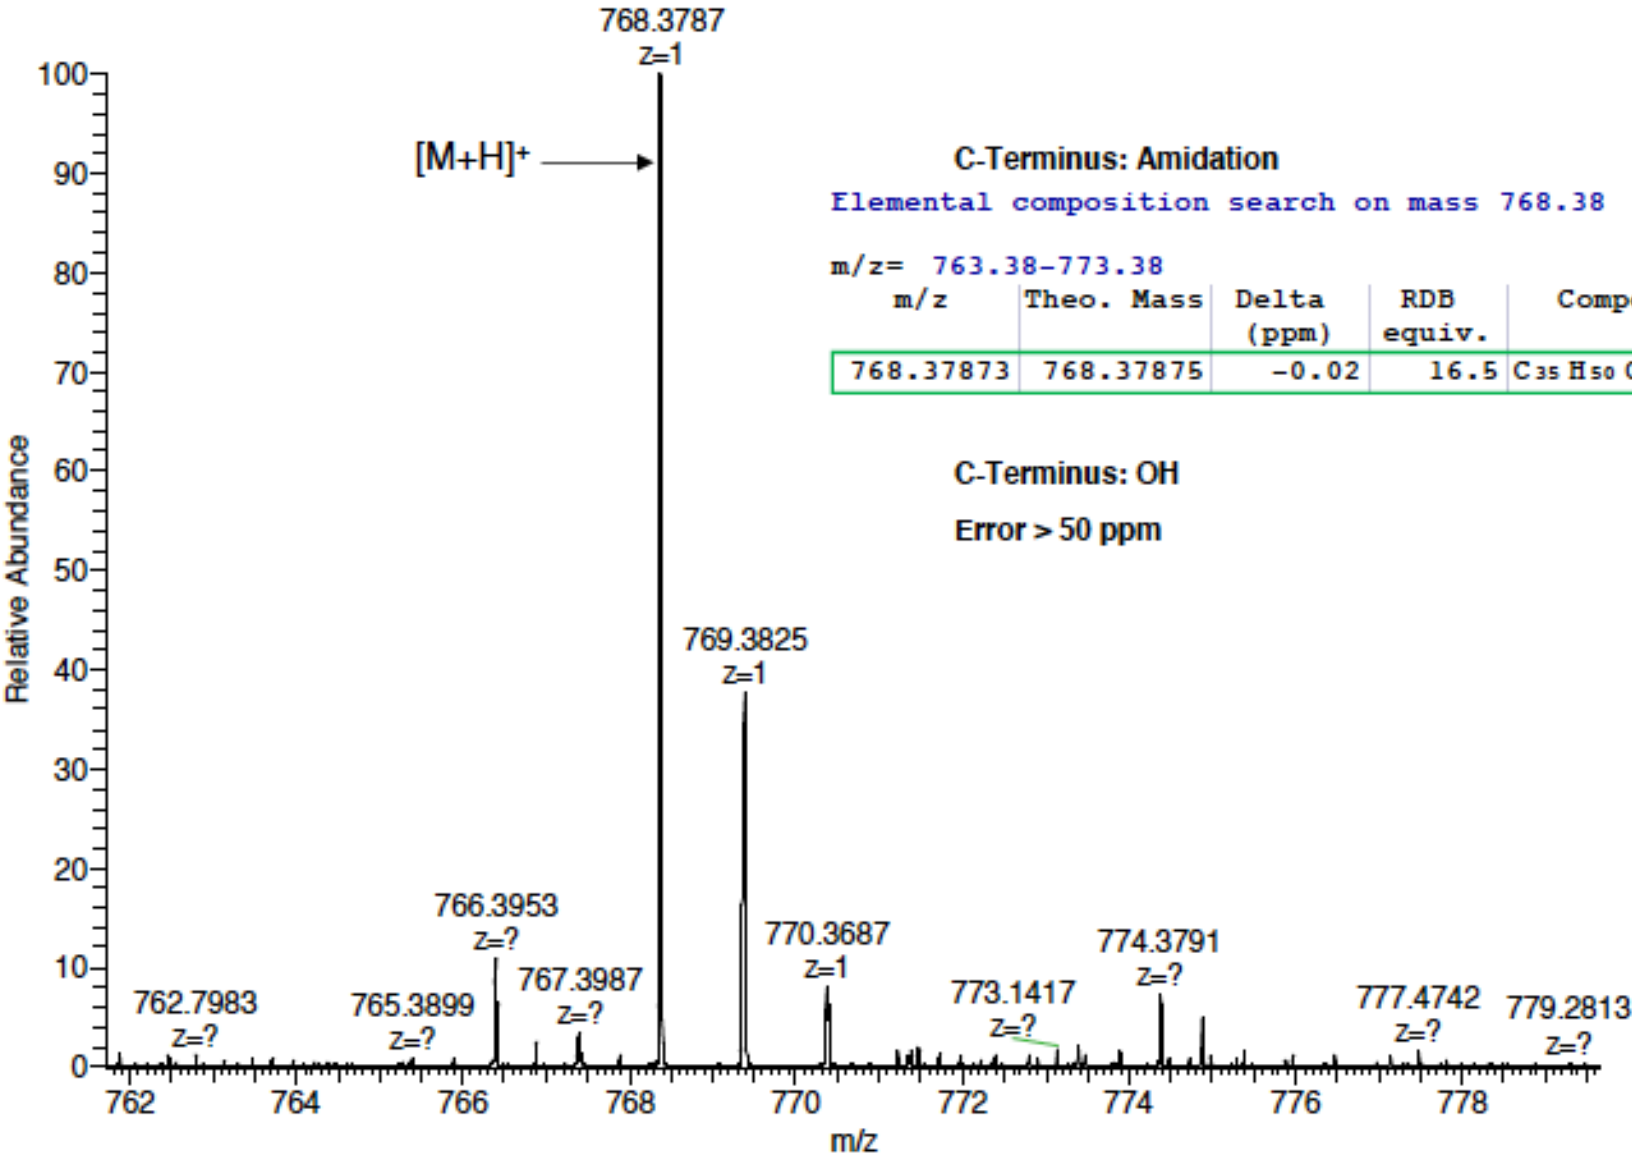

Zoom mass spectrum  
m/z 771-792

AV: 1 NL: 9.71E4

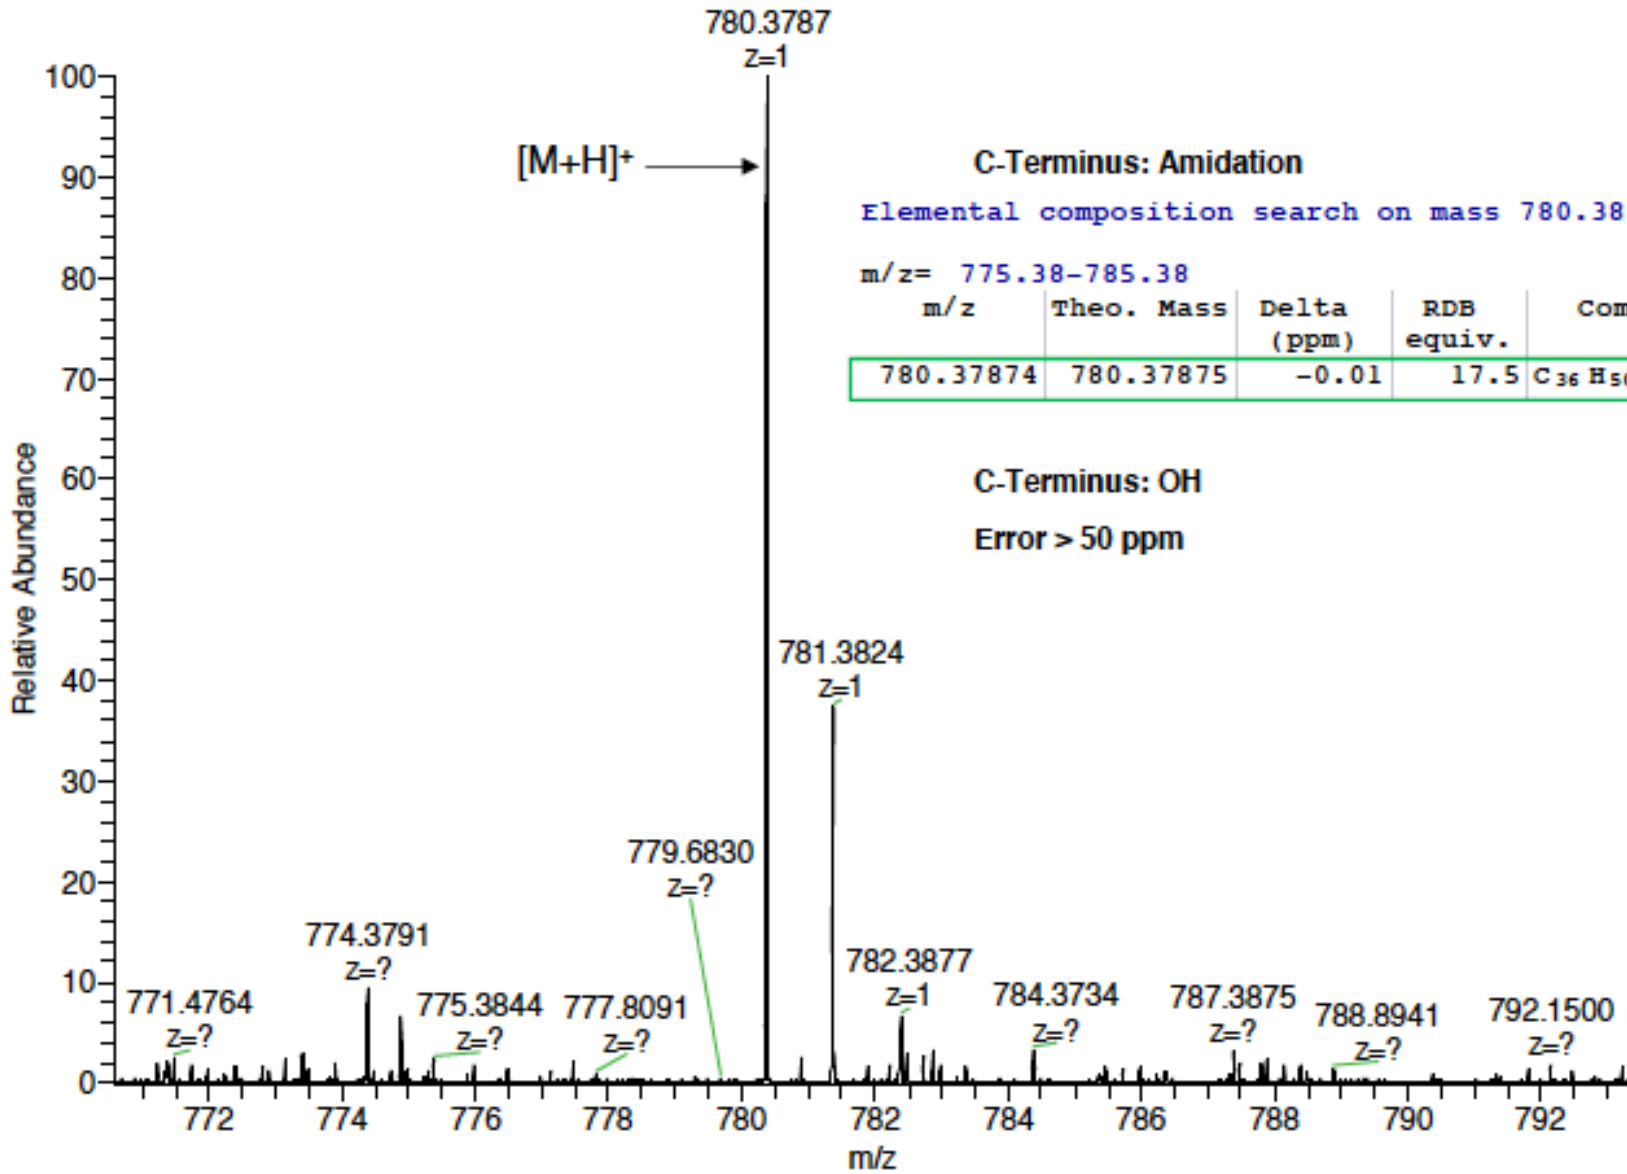

[M+H]<sup>+</sup> →

C-Terminus: Amidation

Elemental composition search on mass 780.38

m/z = 775.38-785.38

| m/z       | Theo. Mass | Delta (ppm) | RDB equiv. | Composition                                                    |
|-----------|------------|-------------|------------|----------------------------------------------------------------|
| 780.37874 | 780.37875  | -0.01       | 17.5       | C <sub>36</sub> H <sub>50</sub> O <sub>9</sub> N <sub>11</sub> |

C-Terminus: OH

Error > 50 ppm



weraay

Zoom mass spectrum  
m/z 784-806

AV: 1 NL: 2.41E5

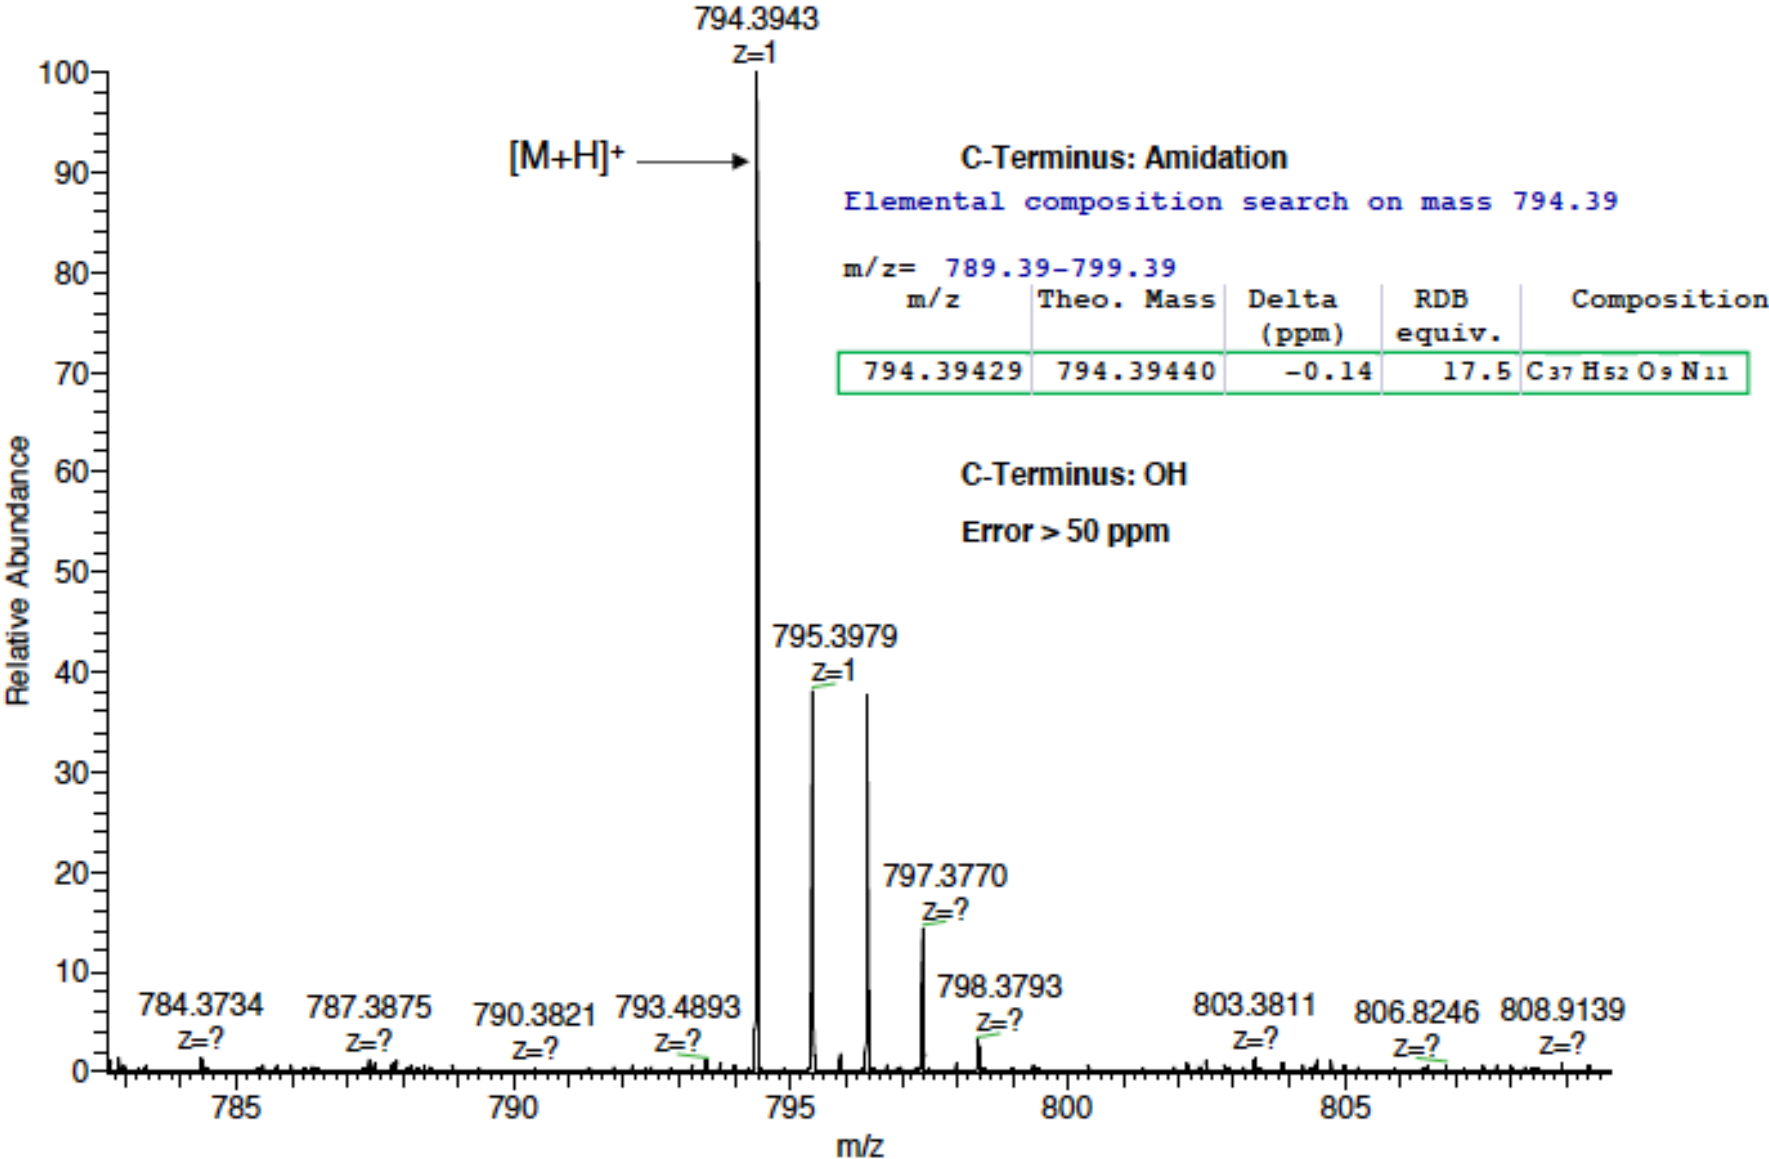

Zoom mass spectrum  
m/z 792-806  
AV: 1 NL: 2.41E5

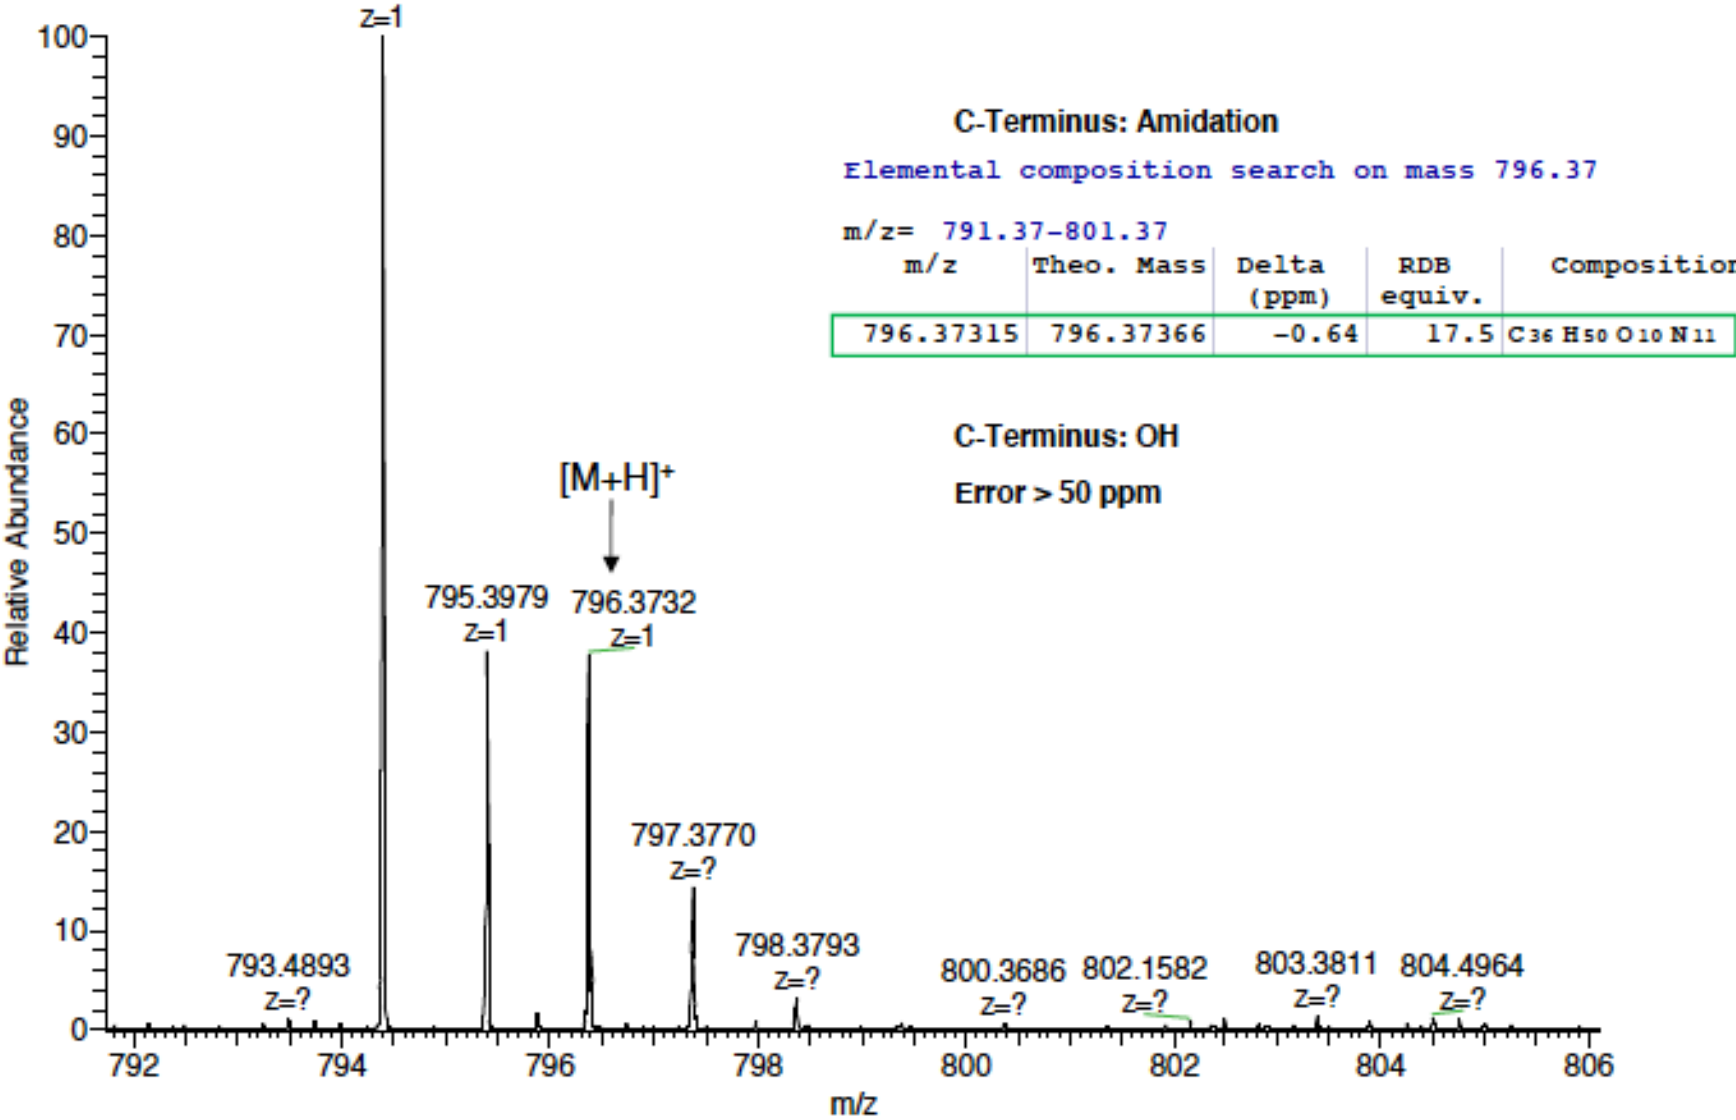

# Zoom mass spectrum

## m/z 799-830

AV: 1 NL: 2.38E5

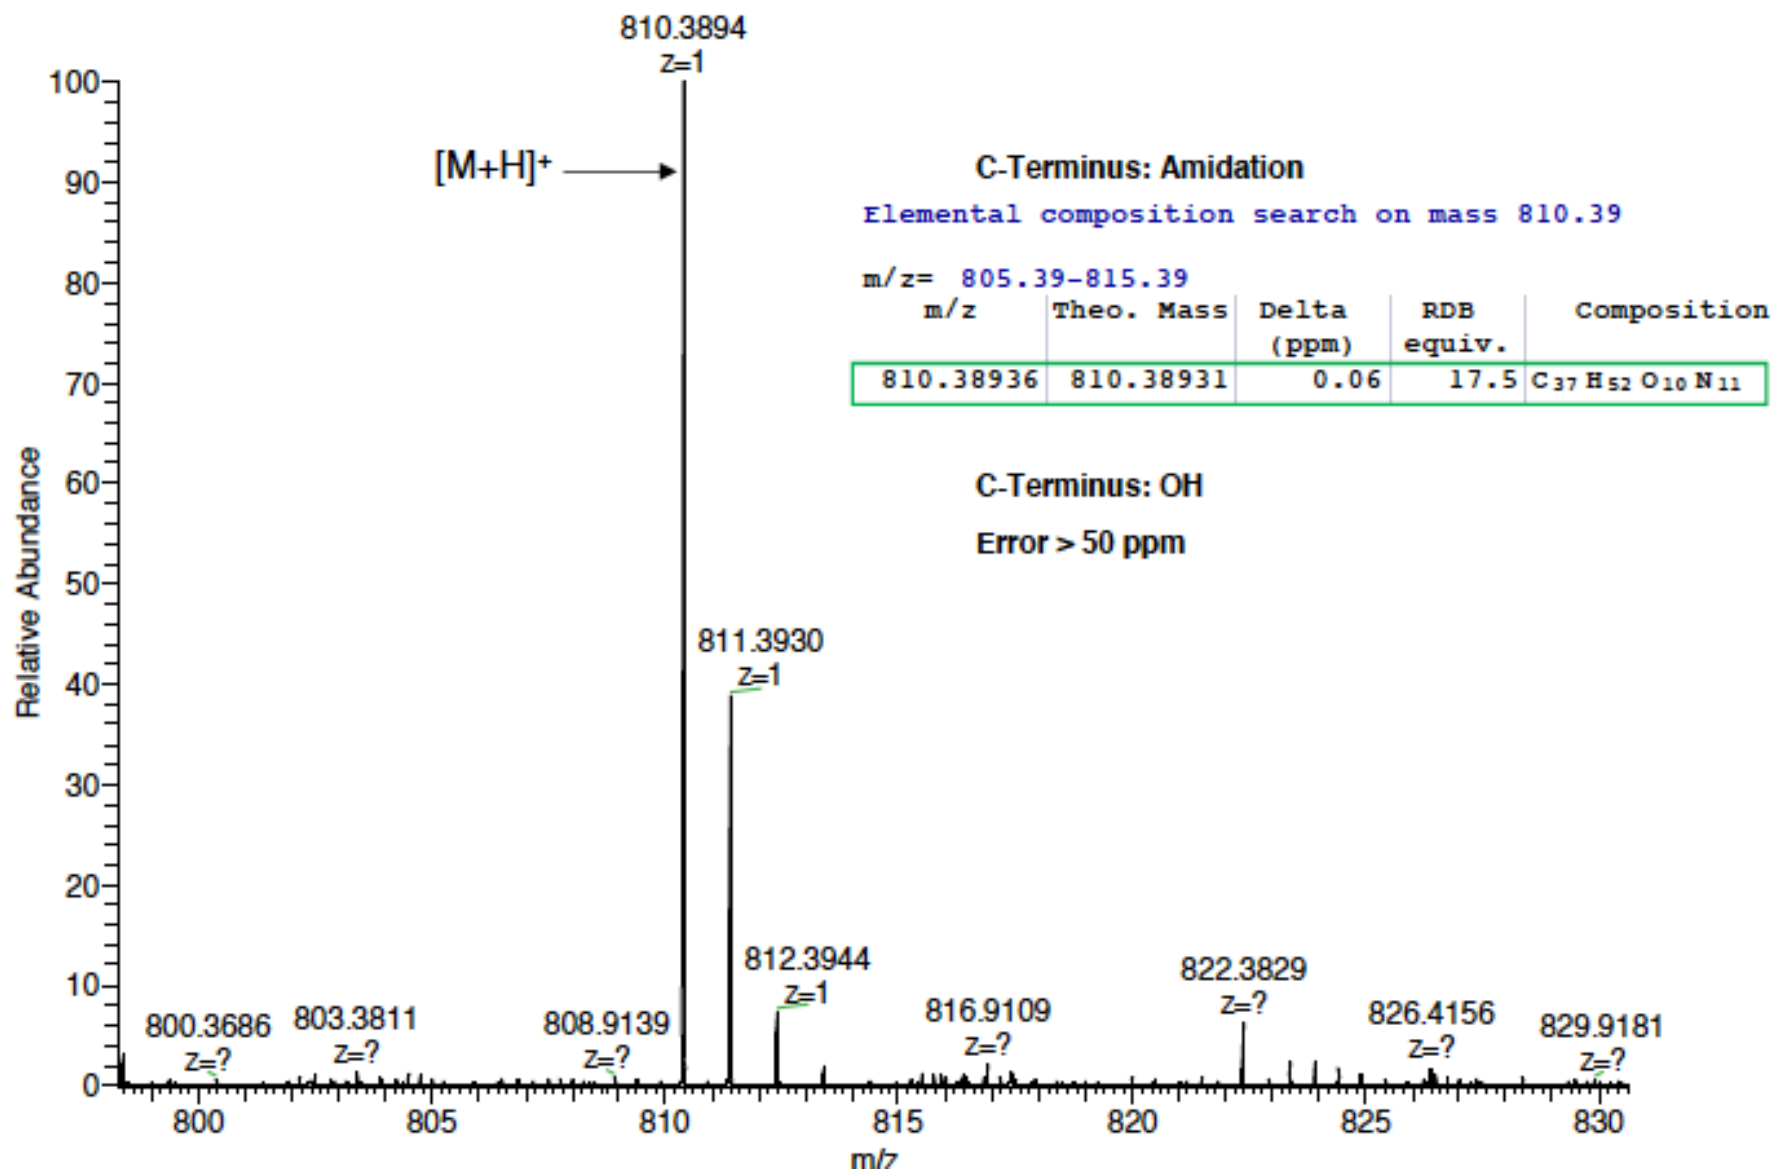

Zoom mass spectrum  
m/z 834-844

AV: 1 NL: 1.03E4

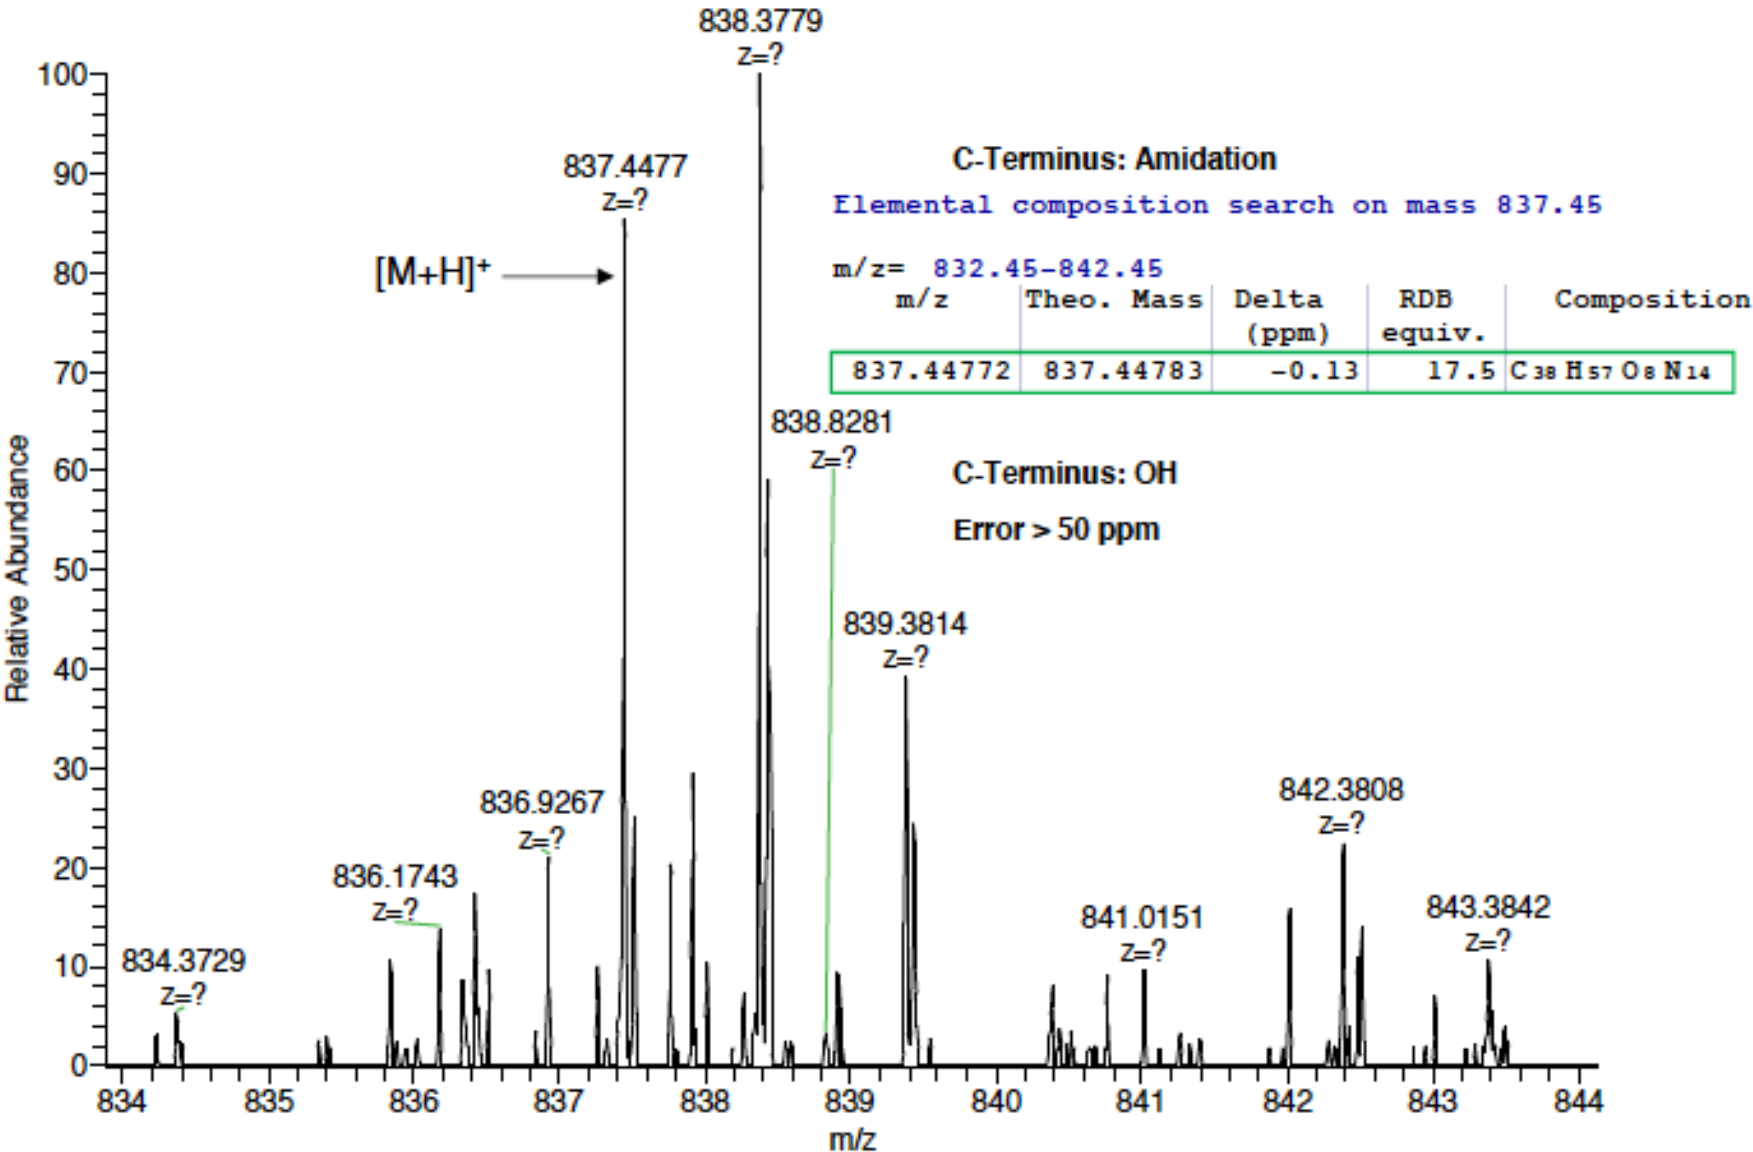

Zoom mass spectrum  
m/z 849-861

AV: 1 NL: 7.32E3

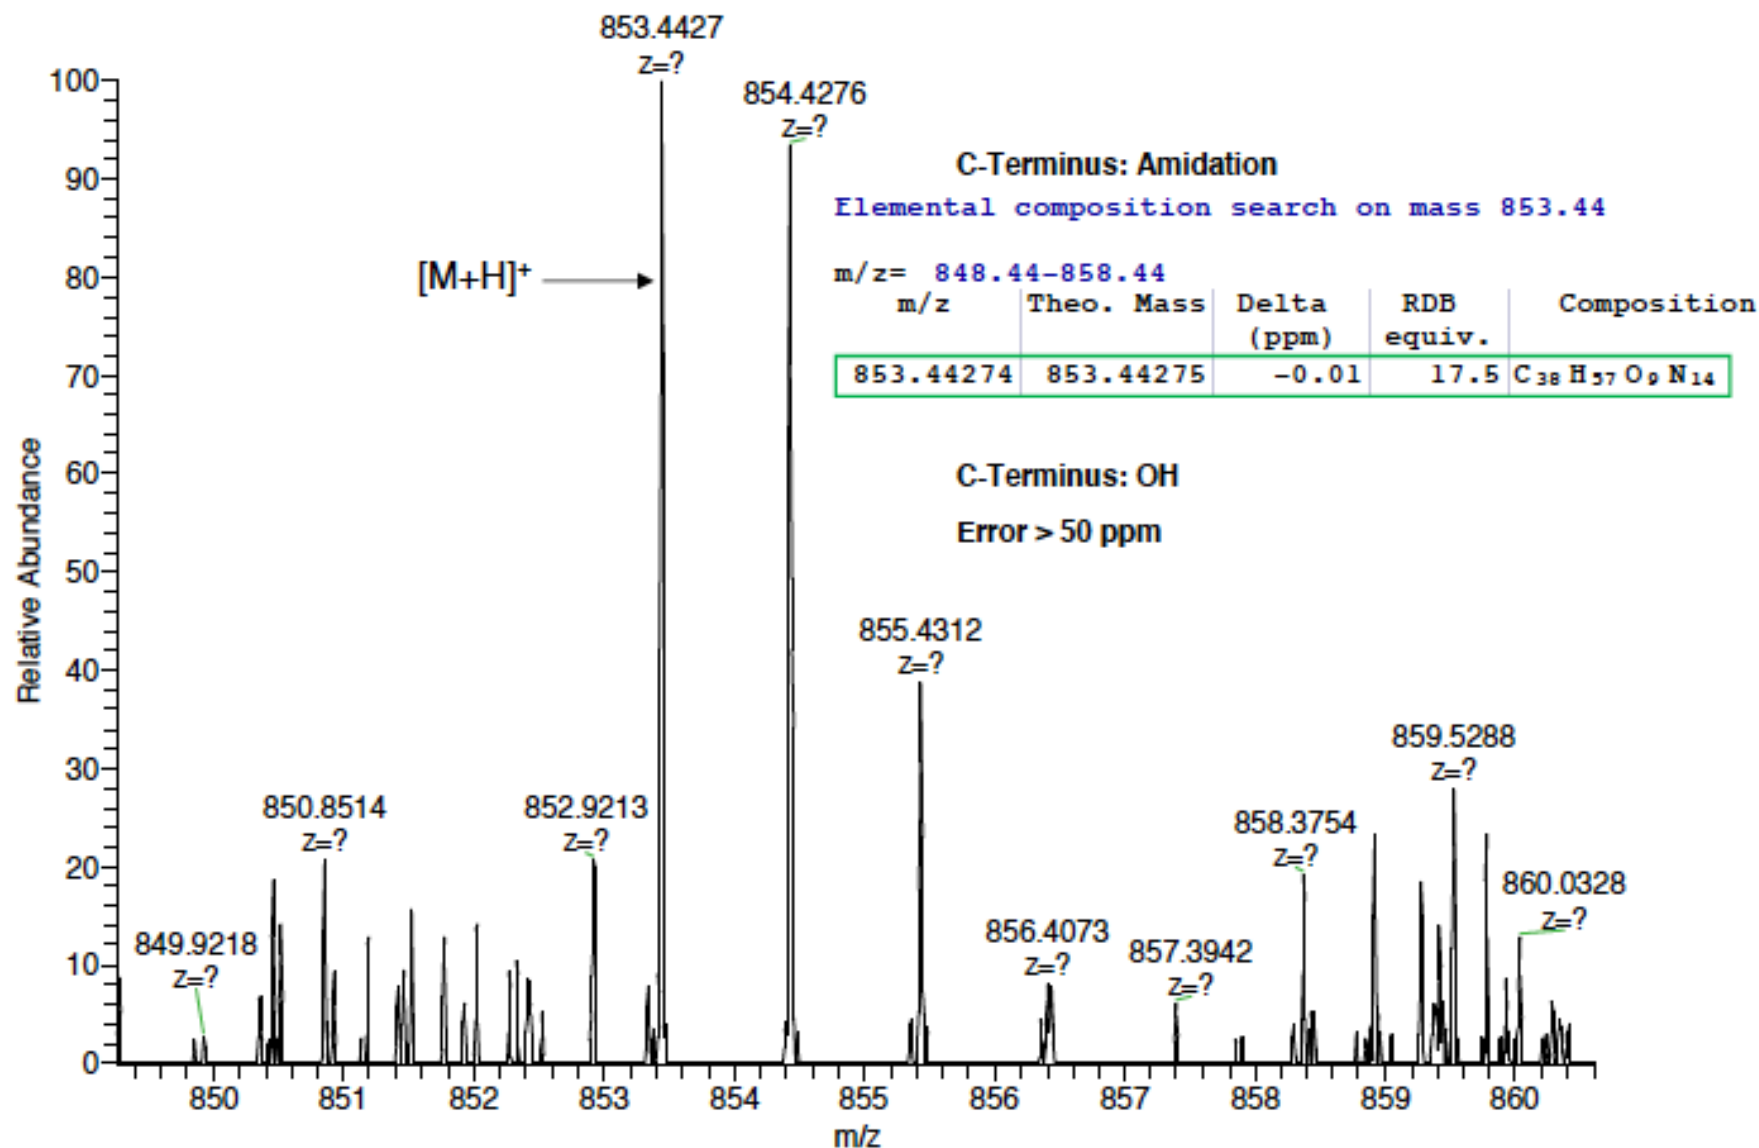

# Zoom mass spectrum

m/z 866-895  
AV: 1 NL: 2.37E4

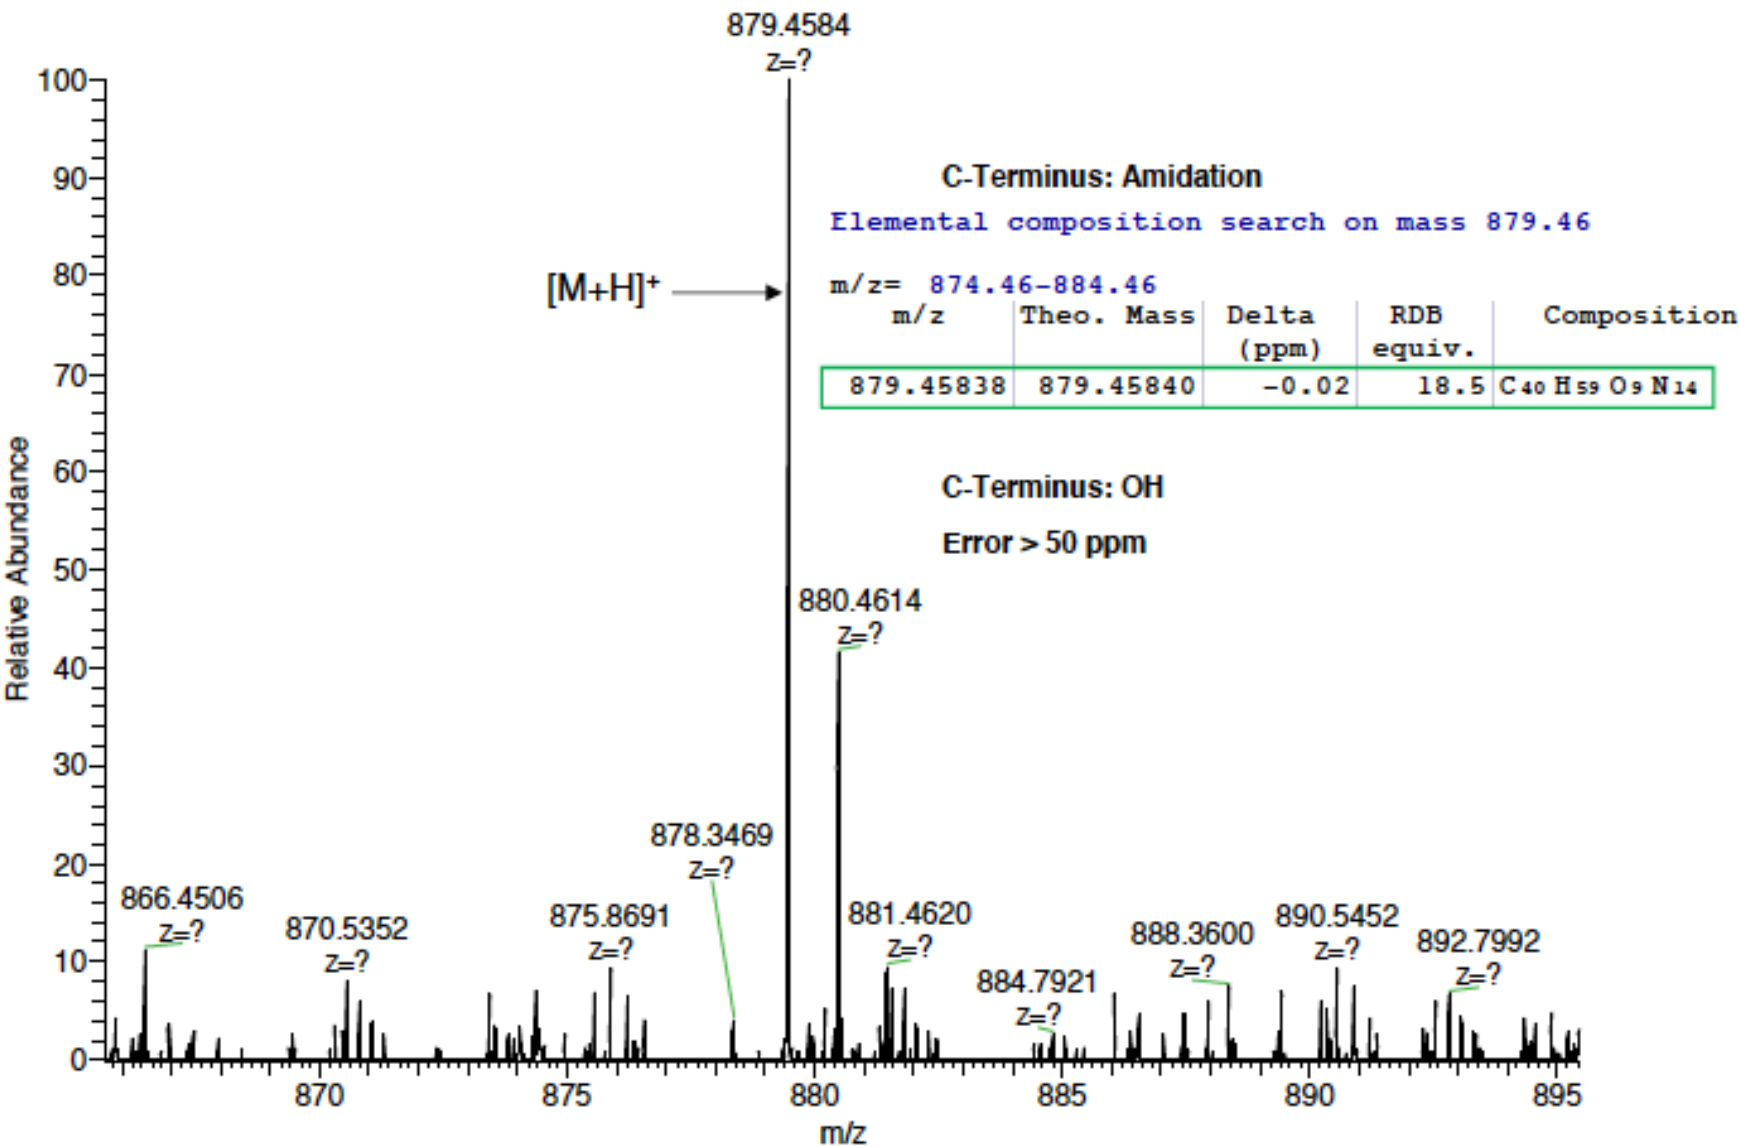

Zoom mass spectrum  
m/z 866-895

AV: 1 NL: 1.75E4

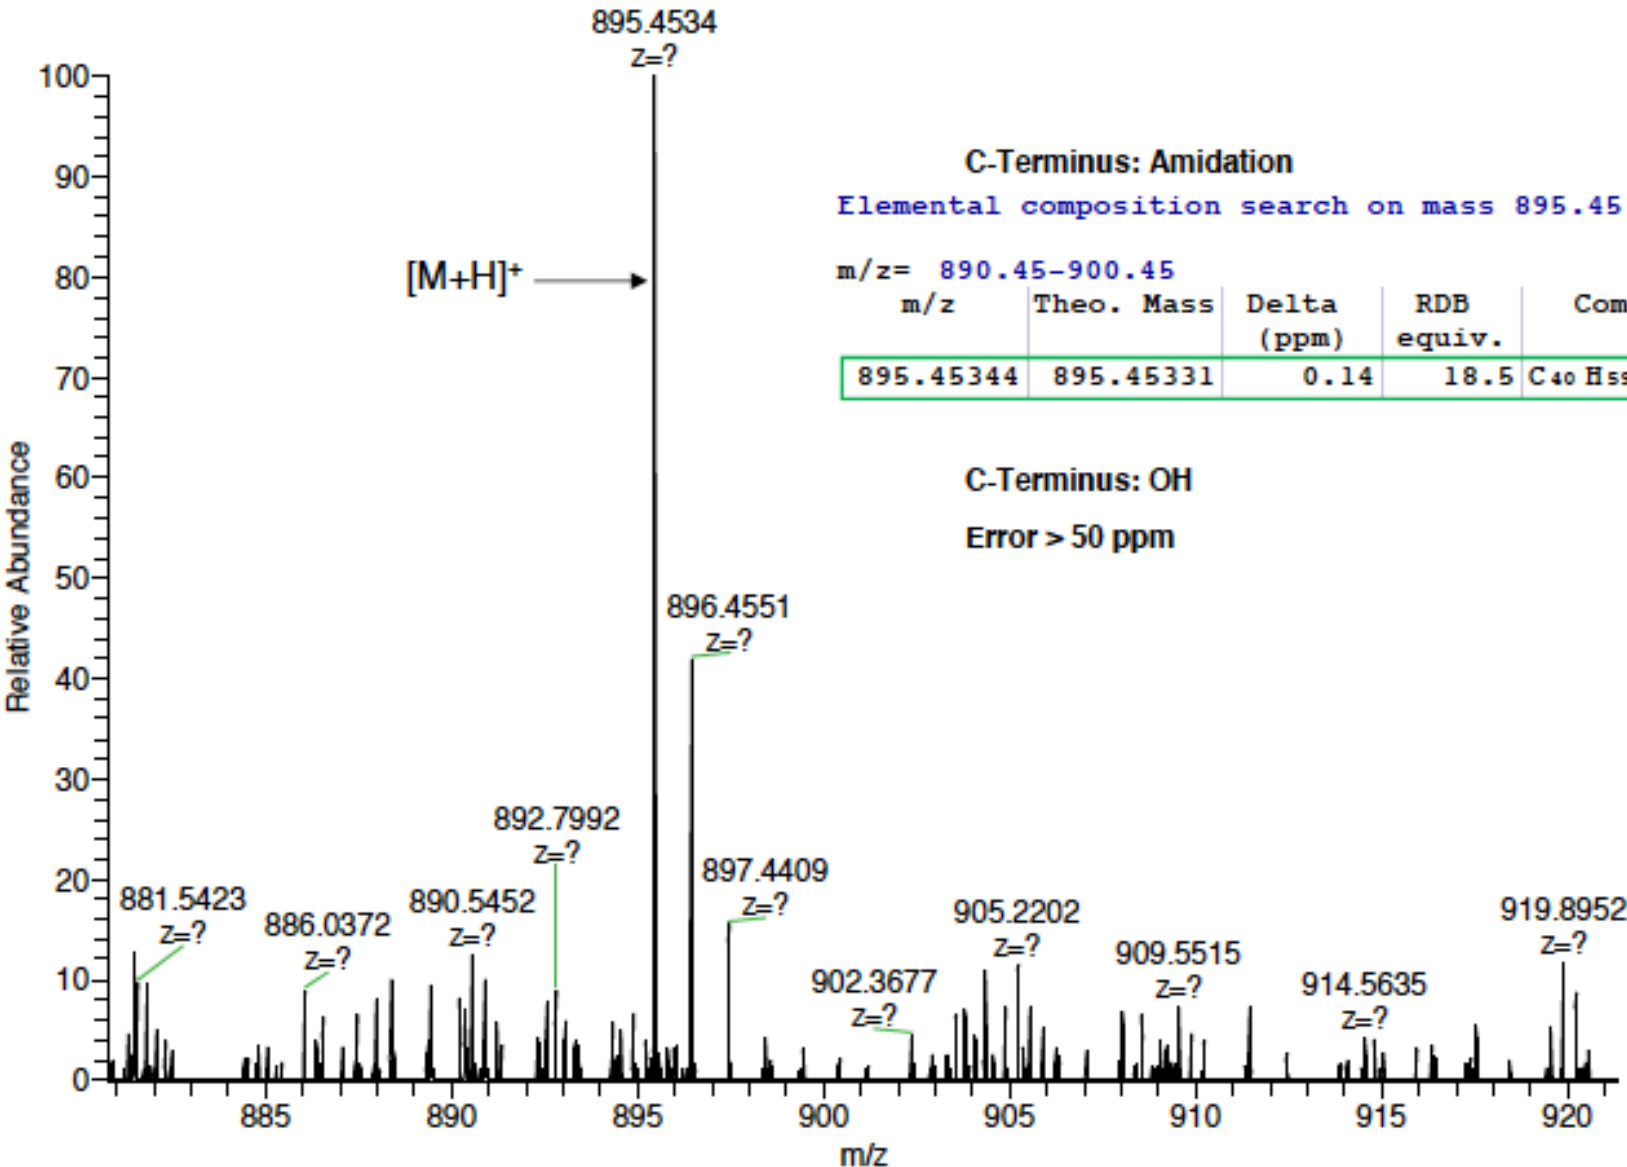

C-Terminus: Amidation  
Elemental composition search on mass 895.45

m/z= 890.45-900.45

| m/z       | Theo. Mass | Delta (ppm) | RDB equiv. | Composition                                                     |
|-----------|------------|-------------|------------|-----------------------------------------------------------------|
| 895.45344 | 895.45331  | 0.14        | 18.5       | C <sub>40</sub> H <sub>59</sub> O <sub>10</sub> N <sub>14</sub> |

C-Terminus: OH  
Error > 50 ppm
